# Supplementary material for: Imidazolium–POSS–anthracene hybridfluorophores for sensitive and selective detection of nitroaromatic compounds (NACs) and polycyclic aromatic hydrocarbon (PAH) derivatives
Source: Royal Society of Chemistry journal article supplement (doi:10.1039/d5tc03926f), 2026-01-01
Supplement: d5tc03926f1.pdf [file d5tc03926f1.pdf]

## Supporting Information

# **Imidazolium-POSS-Anthracene Hybrid Fluorophores for Sensitive and Selective Detection of Nitroaromatics (NACs) and Polycyclic Aromatic Hydrocarbon (PAH) Derivatives**

*Chenchira Pherkkhantod,<sup>a</sup> Supphachok Chanmungkalakul,<sup>b</sup> Vuthichai  
Ervithayasuporn,<sup>a</sup> Worawat Meevasana,<sup>c</sup> Jonggol Tantirungrotechai,<sup>a</sup> and  
Thanthapatra Bunchuay<sup>a,d\*</sup>*

*<sup>a</sup> Department of Chemistry, Center of Excellence for Innovation in Chemistry  
(PERCH-CIC), Faculty of Science, Mahidol University, Bangkok, Thailand.*

*<sup>b</sup> Institute of Sustainability for Chemicals, Energy and Environment (ISCE2),  
Agency for Science, Technology and Research (A\*STAR), 8 Biomedical Grove,  
#07-01 Neuros Building, Singapore, 138665 Republic of Singapore.*

*<sup>c</sup> School of Physics, Suranaree University of Technology and Synchrotron Light  
Research Institute, Nakhon Ratchasima, 30000, Thailand.*

*<sup>d</sup> Center of Sustainable Energy and Green Materials, Mahidol University, Salaya,  
Nakhon Pathom, Thailand.*

*\* Corresponding Author Email: [thanthapatra.bun@mahidol.ac.th](mailto:thanthapatra.bun@mahidol.ac.th)*

# Supporting Information

## Table of Contents

31

|    |                                                                                   |     |
|----|-----------------------------------------------------------------------------------|-----|
| 32 | 1. Material and characterization                                                  | S3  |
| 33 | 2. Synthesis                                                                      | S4  |
| 34 | 3. Nuclear Magnetic Resonance (NMR)                                               | S5  |
| 35 | 4. Thermal Gravimetric Analysis (TGA)                                             | S19 |
| 36 | 5. Powder X-ray Diffraction Analysis (PXRD)                                       | S21 |
| 37 | 6. Anion Exchange                                                                 | S22 |
| 38 | 7. High Resolution Electrospray Ionization Mass Spectrometry (HR-ESI-MS)          |     |
| 39 | S23                                                                               |     |
| 40 | 8. UV-Visible and Fluorescent Spectroscopy study                                  |     |
| 41 | S25                                                                               |     |
| 42 | 9. Solid UV-Visible and Fluorescent Spectroscopy                                  |     |
| 43 | S27                                                                               |     |
| 44 | 10. Effect of Water Content Study                                                 |     |
| 45 | S27                                                                               |     |
| 46 | 11. Fluorescent Titration                                                         | S28 |
| 47 | 12. Quantitative Analysis                                                         | S29 |
| 48 | 13. Measurement of Stern-Volmer rate ( $K_{sv}$ )                                 | S29 |
| 49 | 14. Measurement of the binding constant ( $K_a$ )                                 | S30 |
| 50 | 15. Measurement of the limit of detection (LOD) and limit of quantification (LOQ) | S31 |
| 51 | 16. Selectivity Test                                                              | S32 |
| 52 | 17. Response Time Study                                                           | S32 |
| 53 | 18. Binding Stoichiometry Analysis (Job's plot)                                   | S36 |
| 54 | 19. Determination of Quantum Fluorescence Yield                                   | S37 |
| 55 | 20. The Effect of Ionic Strength                                                  | S40 |
| 56 | 21. Anti-interference studies and real water sample analysis                      | S41 |
| 57 | 22. $^1\text{H}$ -NMR Titration                                                   | S46 |
| 58 | 23. Computational Details                                                         | S53 |

## Supporting Information

59 24. Reference

S59

60

61

### 62 **Material and characterization**

#### 63 **Material**

64 All chemical reagents in this research were purchased and used without further  
65 purification from Tokyo Chemical Industry (TCI), Sigma-Aldrich, and Merck. Deionized (DI)  
66 water (ASTM type 2) was obtained from SIEMENS Ultra Clear water purifier. AR grade  
67 acetonitrile (MeCN), diethyl ether, dimethyl sulfoxide (DMSO), dimethyl formamide (DMF),  
68 tetrahydrofuran (THF), and ethanol (EtOH) were purchased from RCI Labscan. THF was  
69 distilled before use. Commercial-grade acetone, hexane, methanol (MeOH), and  
70 dichloromethane (DCM) were distilled before use. All nitroaromatics and polyaromatic  
71 hydrocarbons were analytical grade and used without further purification. Tap water samples  
72 were collected from the Faculty of Science, Mahidol University, Thailand, while drinking water  
73 samples were obtained from commercially available bottled water (Purra brand). POSS-OH and  
74 POSS-Cl were synthesized following the synthetic procedure in the previously reported  
75 procedure.<sup>1, 2</sup>

#### 76 **Characterization**

77 All samples for <sup>1</sup>H-NMR, <sup>13</sup>C-NMR, <sup>19</sup>F-NMR, and <sup>29</sup>Si-NMR spectroscopic analysis  
78 were prepared as solutions in different deuterated solvent systems including *d*<sub>6</sub>-DMSO, CDCl<sub>3</sub>,  
79 and CDCl<sub>3</sub>/CFCl<sub>3</sub>, depending on the nature of samples. The NMR spectra were recorded on a  
80 Bruker-AVANCE 400 MHz spectrometer, and the spectral data were reported in the form of  
81 chemical shifts in ppm units. UV-Visible measurements of solution and solid samples were  
82 performed on a UV-2600 Shimadzu spectrophotometer. Fluorescence spectroscopic  
83 measurements were carried out on a Horiba FluoroMax 4+, and the spectral data were processed  
84 using the FluoroMax software. High-resolution mass spectra (HRMS) were acquired using a  
85 Bruker microTOF spectrometer operating in electrospray ionization (ESI) mode. Powder X-ray  
86 diffraction (PXRD) data were collected on Bruker D8 Advance diffractometer CuKα radiation (λ

## Supporting Information

87 = 0.15418 Å). The experiment was conducted at an operating voltage of 40 kV and a current of  
88 30 mA. Data collection was carried out over a  $2\theta$  range of  $5.00^\circ$  to  $50.00^\circ$ , with a scan rate of  $5^\circ$   
89 per second. Thermogravimetric analysis (TGA) was carried out on an SDT 2960 SDT V3.0F  
90 instrument under air flow at a heating rate of  $10^\circ\text{C}\cdot\text{min}^{-1}$  in a temperature range of  $25\text{--}800^\circ\text{C}$ .

91

### 92 Synthesis

93

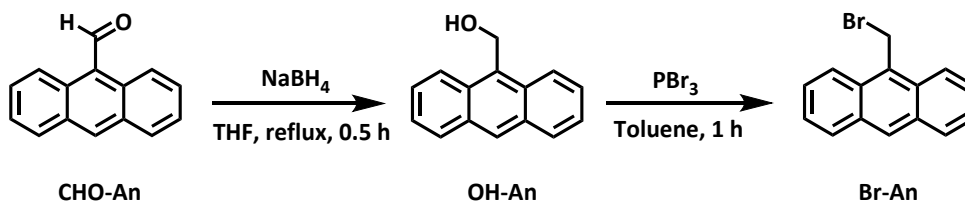

94

95 **Scheme S1** The synthesis of 9-(Bromomethyl)anthracene (Br-An)

96 **9-(Bromomethyl)anthracene (Br-An).** 9-Anthracenemethanol (OH-An) was prepared

97 following the previous report.<sup>3</sup> The OH-An (0.41 g, 2.02 mmol) and toluene (30 mL) were added  
98 to a round-bottom flask and stirred under inert  $\text{N}_2$ . Subsequently,  $\text{PBr}_3$  (0.30 mL, 3.19 mmol) was  
99 added slowly to the reaction at  $0^\circ\text{C}$  and stirred for 1 h. The mixture was warmed to room

100 temperature, followed by the addition of saturated aqueous  $\text{Na}_2\text{CO}_3$  (15 mL). The organic phase  
101 was washed with water (20 mL) several times and brine (10 mL). The organic phase was dried  
102 with  $\text{Na}_2\text{SO}_4$  and removed solvent *in vacuo* to obtain the final product as a greenish solid.<sup>4</sup>

103  $^1\text{H}$ -NMR (400 MHz,  $\text{CDCl}_3$ ):  $\delta$  8.50 (s, 1H), 8.32-8.30 (d, 2H), 8.06-8.03 (d, 2H), 7.67-7.63 (t, 2H),  
104 7.53-7.49 (t, 2H), 5.55 (s, 2H);  $^{13}\text{C}$ -NMR (100 MHz,  $\text{CDCl}_3$ ):  $\delta$  131.7, 129.9, 129.4, 129.3, 128.0,  
105 126.9, 125.5, 123.7, 27.1; HRMS (ESI): Anal. calcd. for  $[\text{C}_{15}\text{H}_{11}\text{Br} + \text{H}]^+$   $m/z$  = 271.0117, found  
106  $m/z$  = 271.0113.

107

108

109

110

111



## Supporting Information

### Nuclear Magnetic Resonance (NMR)

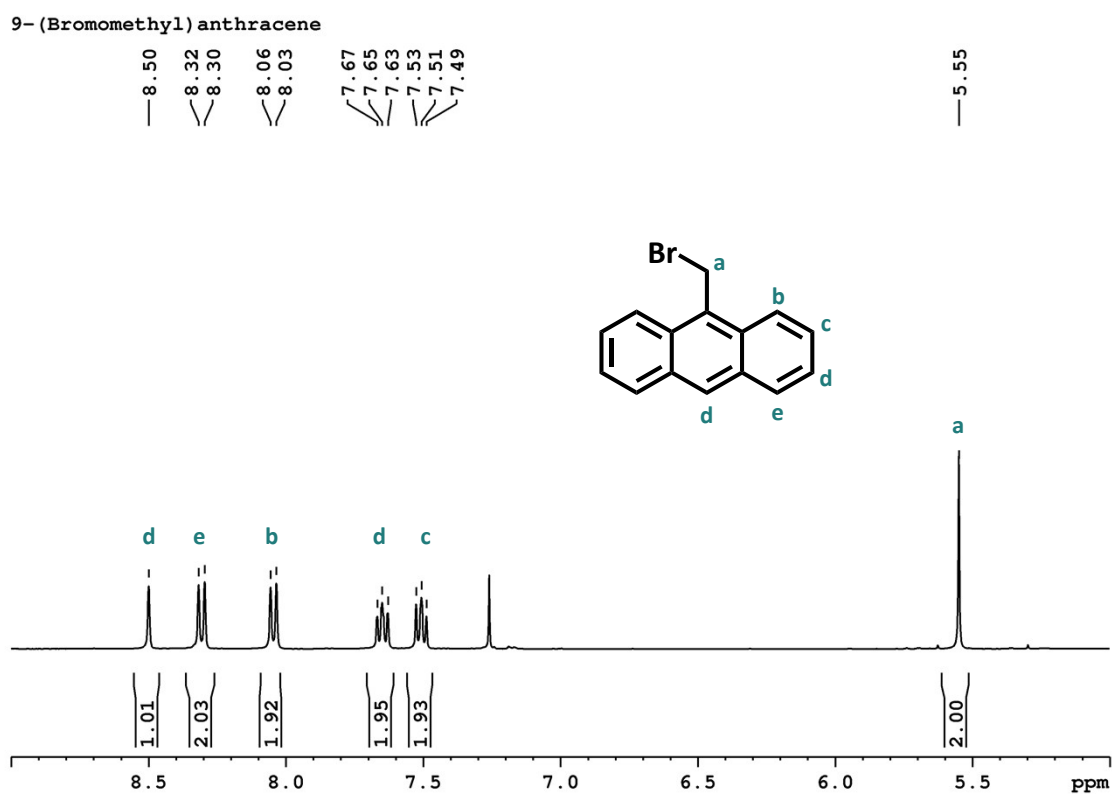

**Fig. S1**  $^1\text{H}$ -NMR spectrum of 9-(Bromomethyl) anthracene (Br-An), (400 MHz,  $\text{CDCl}_3$ )

## Supporting Information

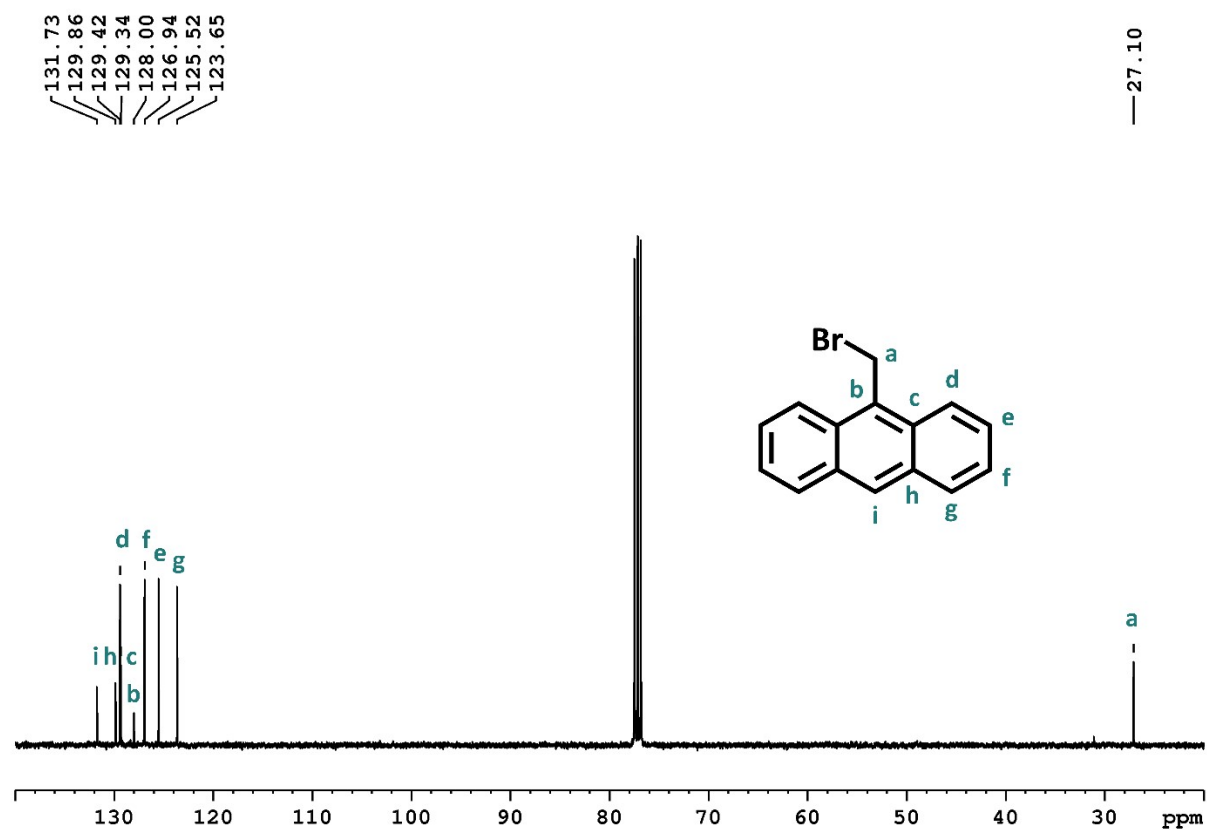

**Fig. S2**  $^{13}\text{C}$ -NMR spectrum of 9-(Bromomethyl) anthracene (Br-An), (100 MHz,  $\text{CDCl}_3$ )

# Supporting Information

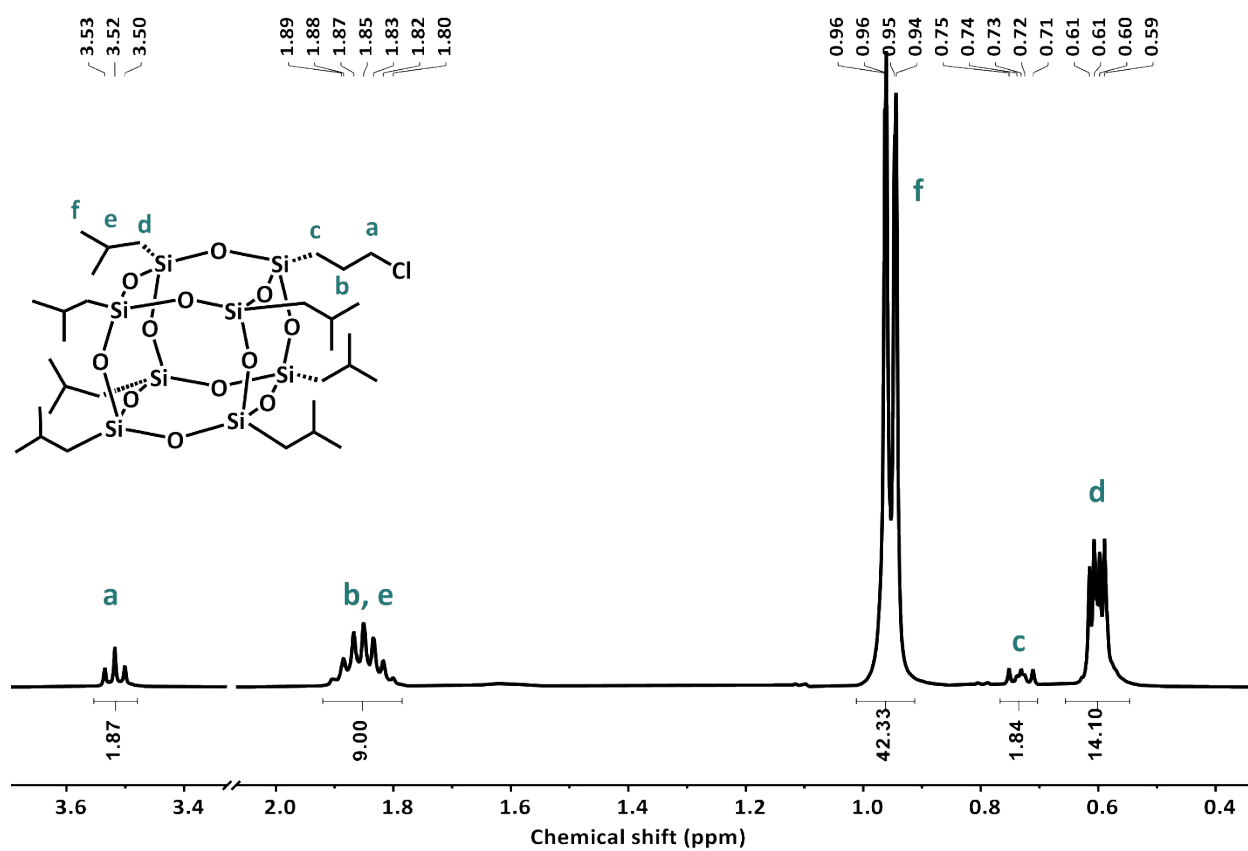

**Fig. S3**  $^1\text{H}$ -NMR spectrum of (3-chloropropyl) hepta (i-butyl)octasilsesquioxane (POSS-Cl), (400 MHz,  $\text{CDCl}_3$ ).

## Supporting Information

154  
155  
156  
157  
158  
159

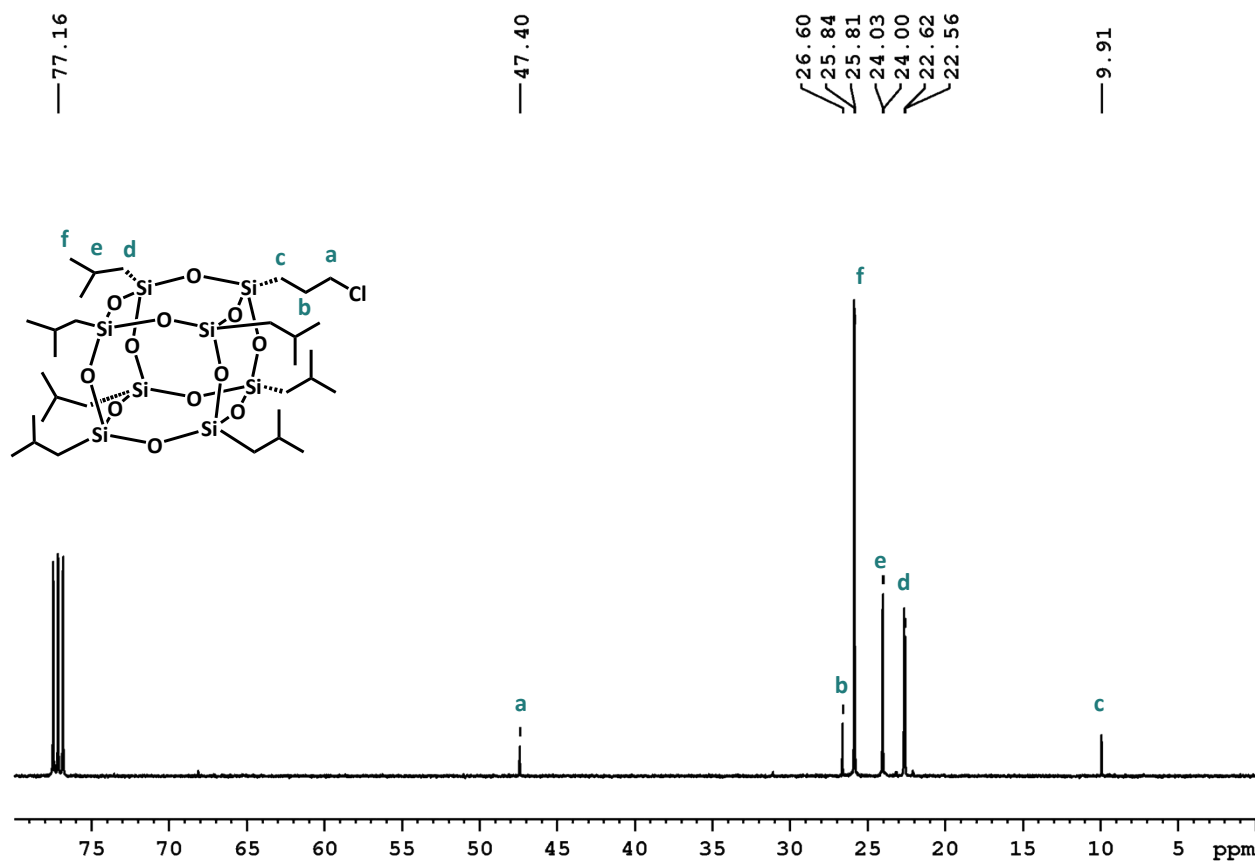

161 **Fig. S4**  $^{13}\text{C}$ -NMR spectrum of (3-chloropropyl) hepta (i-butyl)octasilsesquioxane (POSS-Cl),  
162 (100 MHz,  $\text{CDCl}_3$ ).

163  
164  
165  
166  
167

## Supporting Information

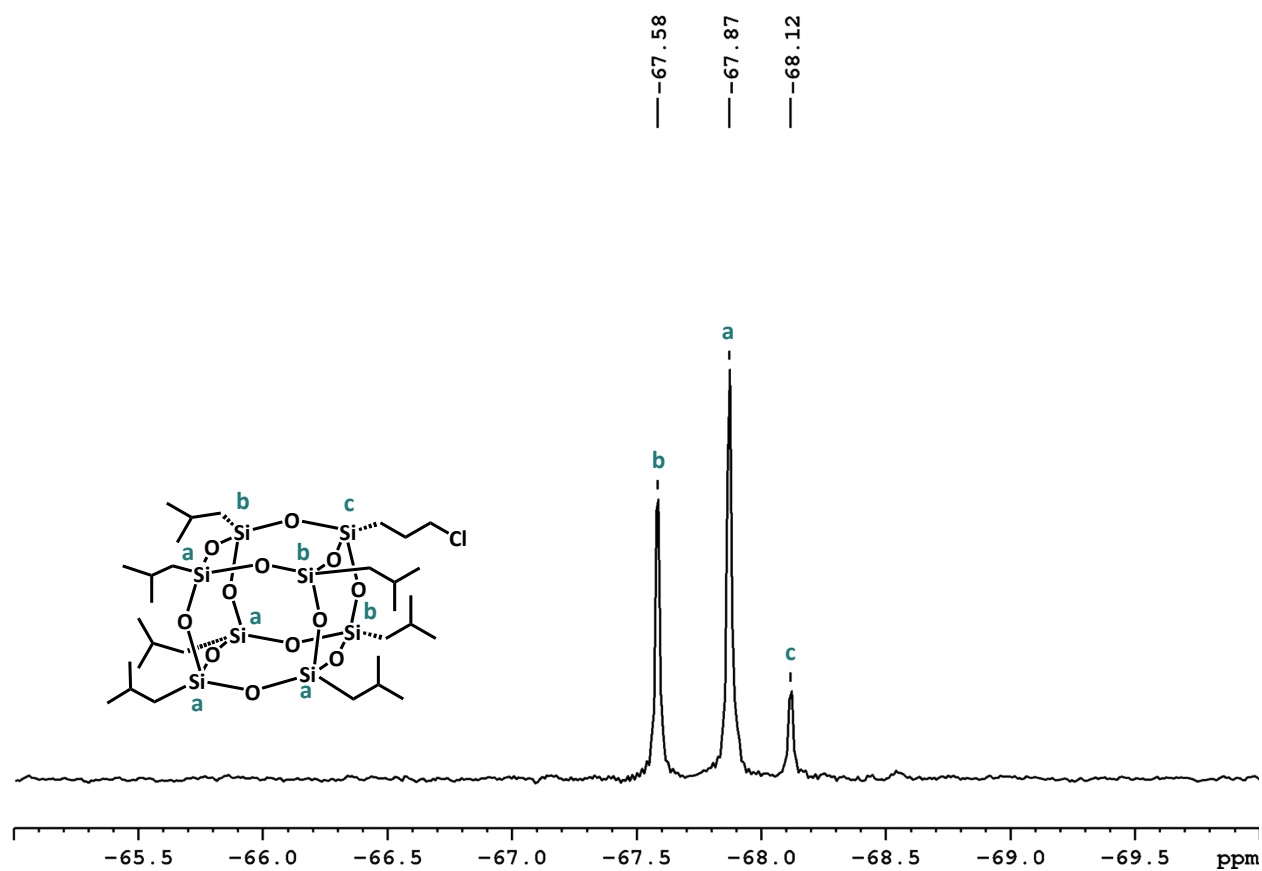

**Fig. S5**  $^{29}\text{Si}$ -NMR spectrum of (3-chloropropyl) hepta (i-butyl)octasilsesquioxane (POSS-Cl), (79 MHz,  $\text{CDCl}_3$ ).

# Supporting Information

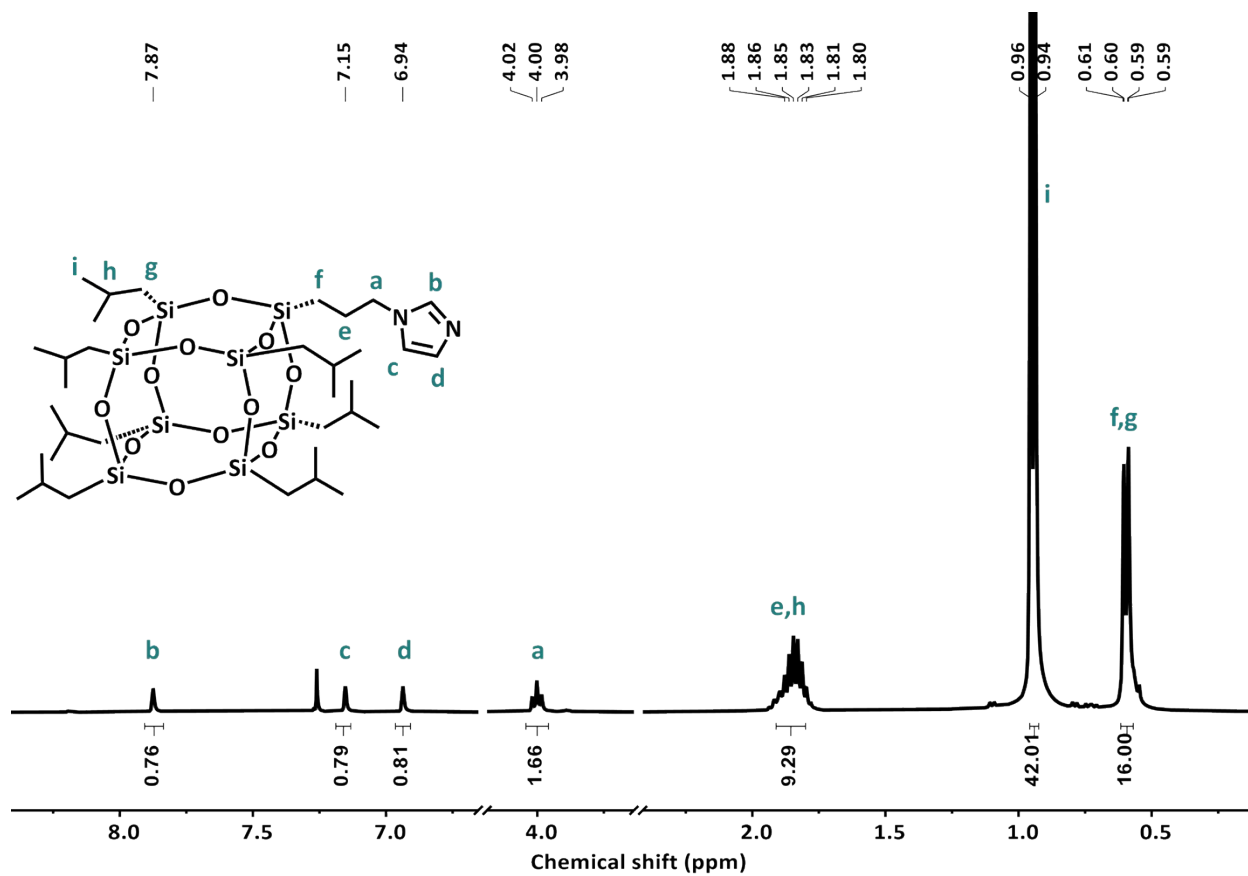

**Fig. S6**  $^1\text{H}$ -NMR spectrum of isobutyl-POSS-propyl-3-imidazole (POSS-Im) (400 MHz,  $\text{CDCl}_3$ ).

# Supporting Information

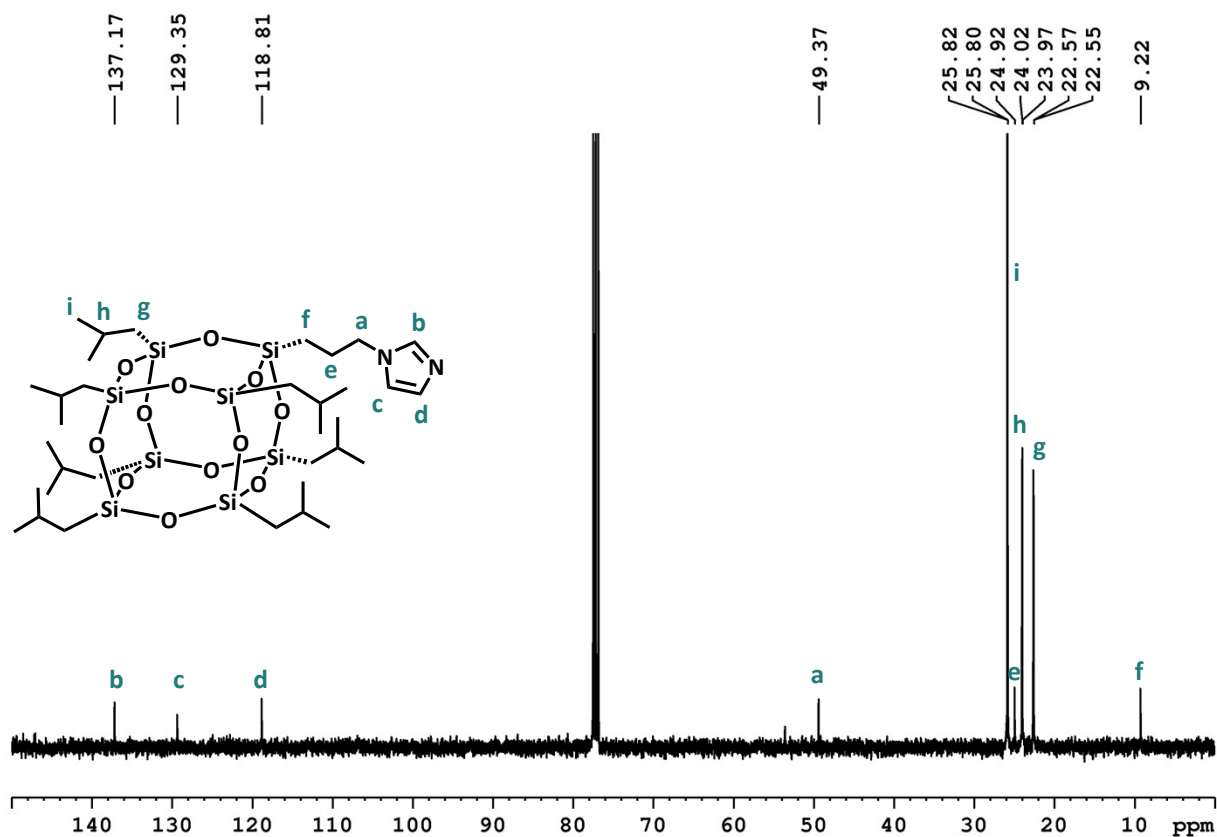

**Fig. S7**  $^{13}\text{C}$ -NMR spectrum of isobutyl-POSS-propyl-3-imidazole (POSS-Im), (100 MHz,  $\text{CDCl}_3$ ).

## Supporting Information

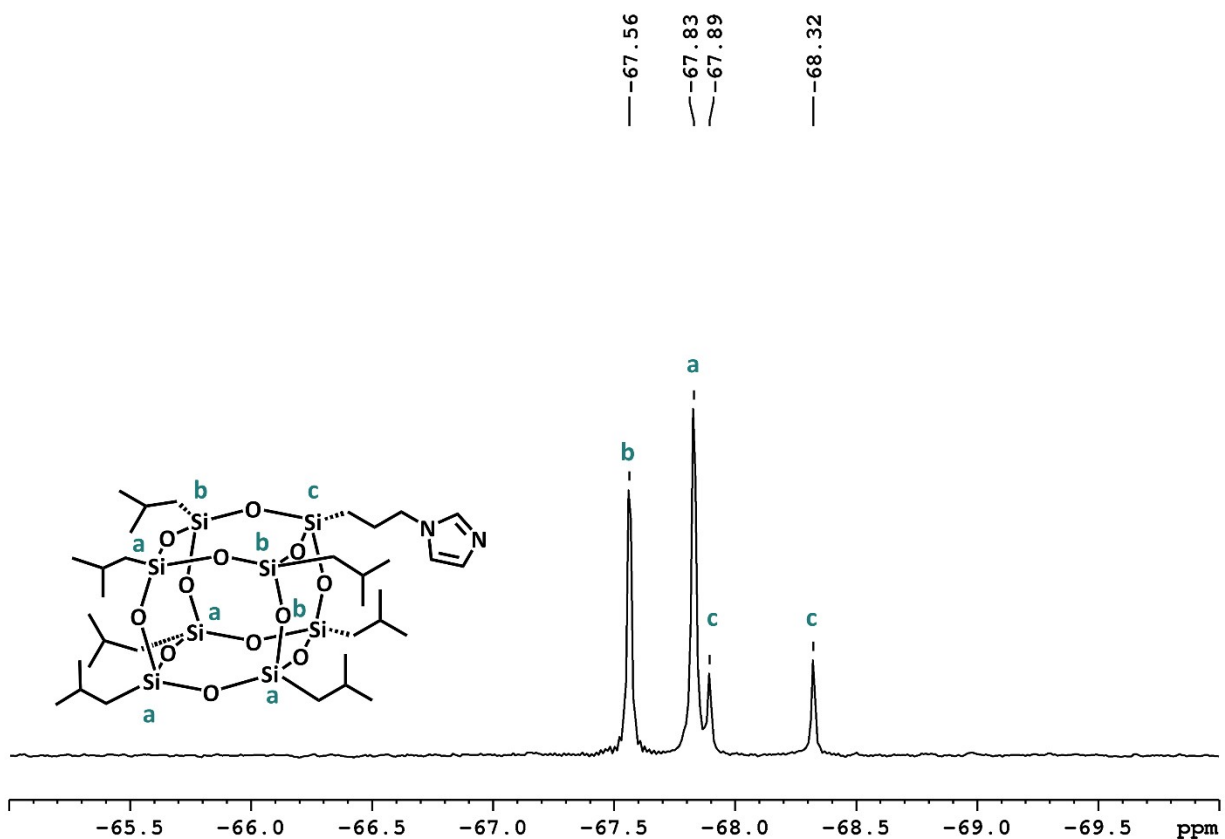

**Fig. S8**  $^{29}\text{Si}$ -NMR spectrum of isobutyl-POSS-propyl-3-imidazole (POSS-Im), (79 MHz,  $\text{CDCl}_3$ ).



# Supporting Information

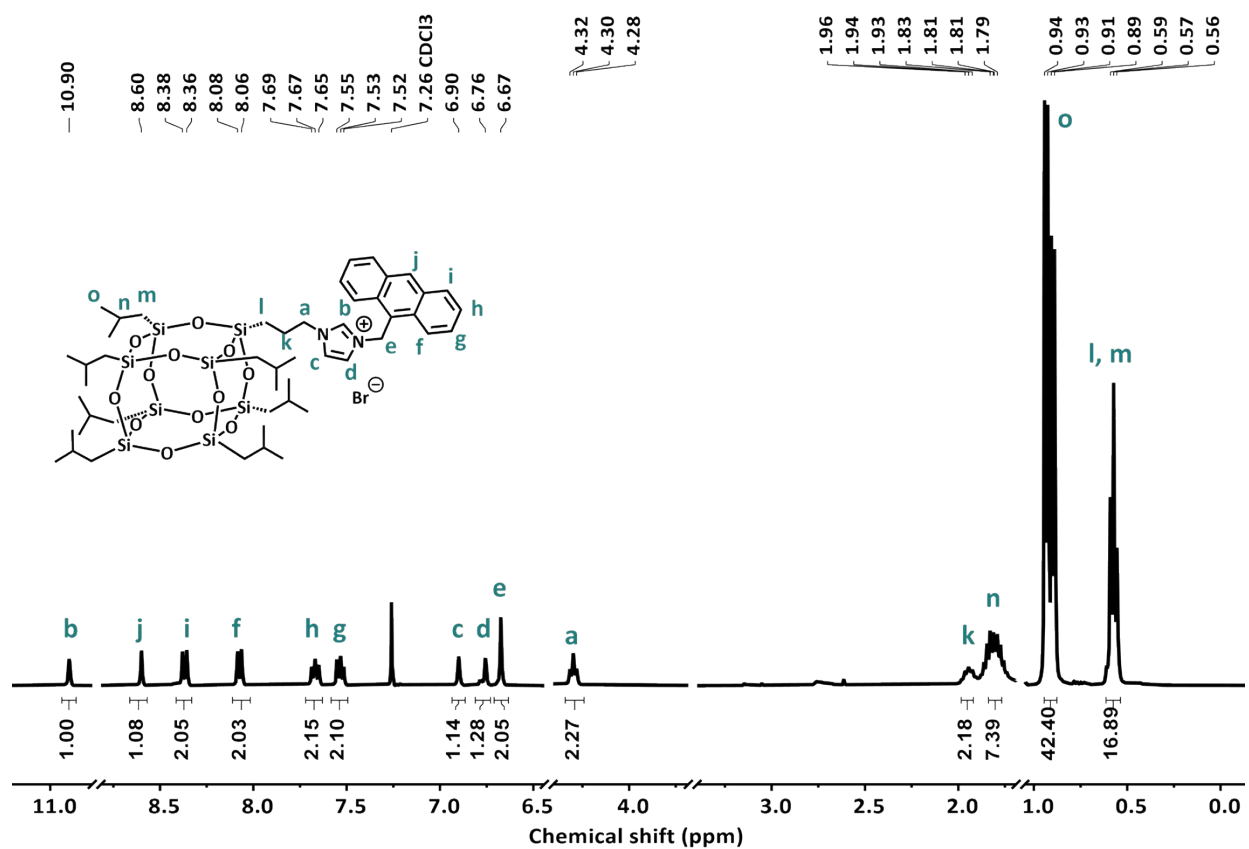

**Fig. S9** <sup>1</sup>H-NMR spectrum of POSS-Im-An-Br (400 MHz, CDCl<sub>3</sub>).

# Supporting Information

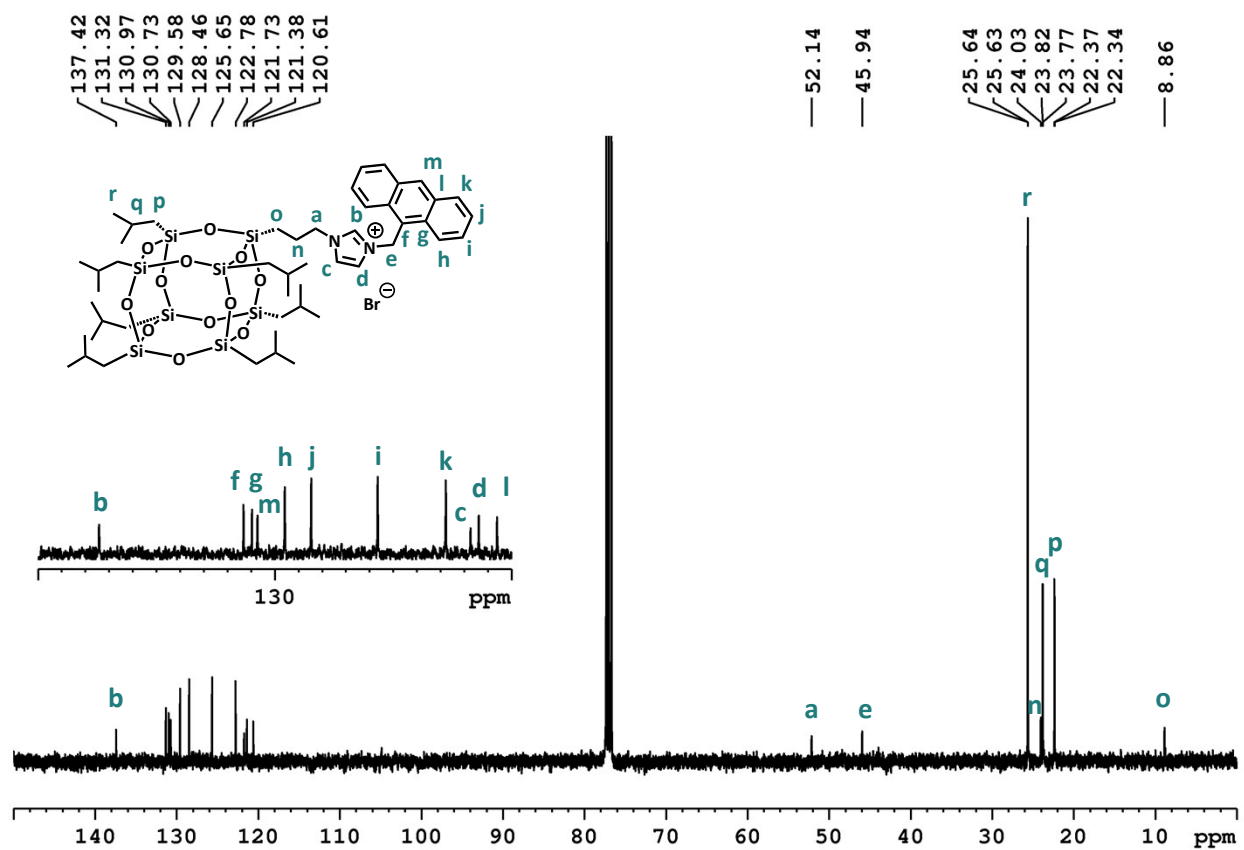

**Fig. S10** <sup>13</sup>C-NMR spectrum of POSS-Im-An·Br (100 MHz, CDCl<sub>3</sub>).

## Supporting Information

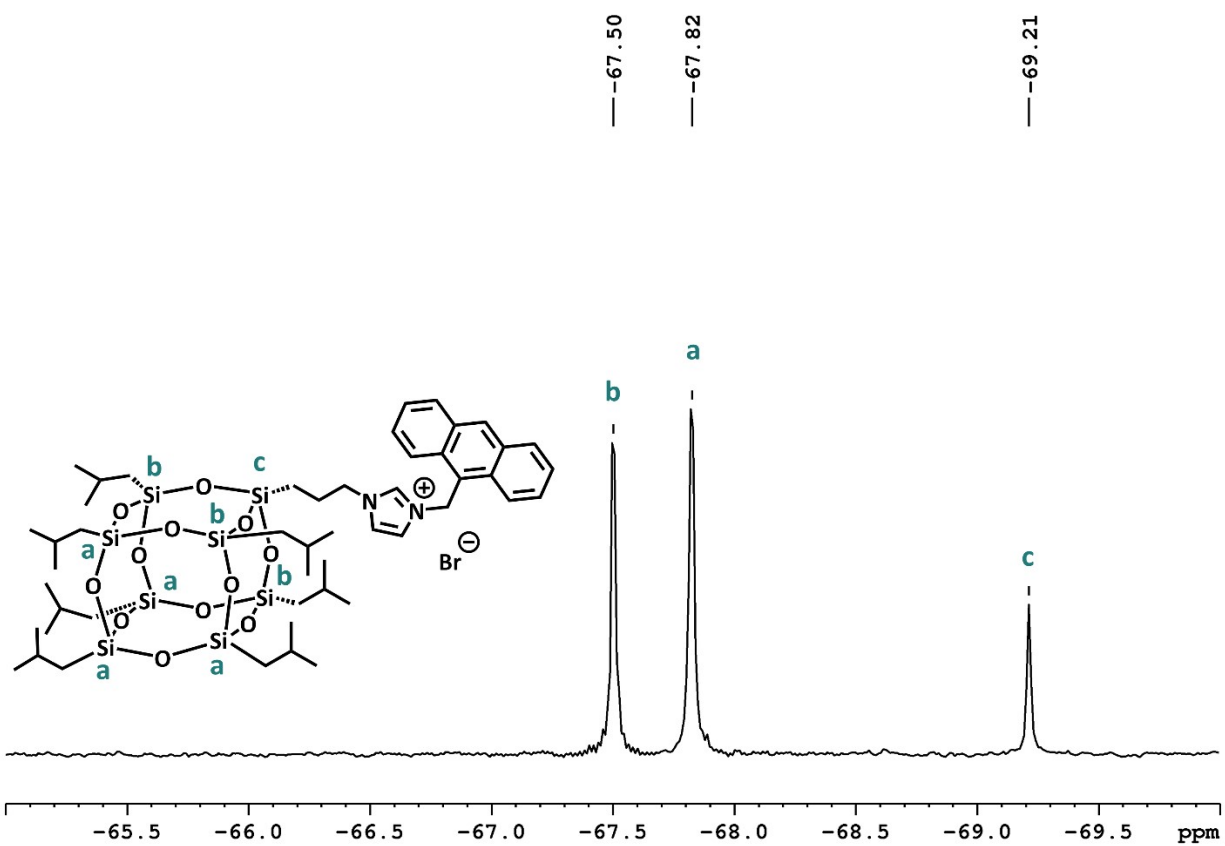

**Fig. S11**  $^{29}\text{Si}$ -NMR spectrum of POSS-Im-An·Br (79 MHz,  $\text{CDCl}_3$ ).

## Supporting Information

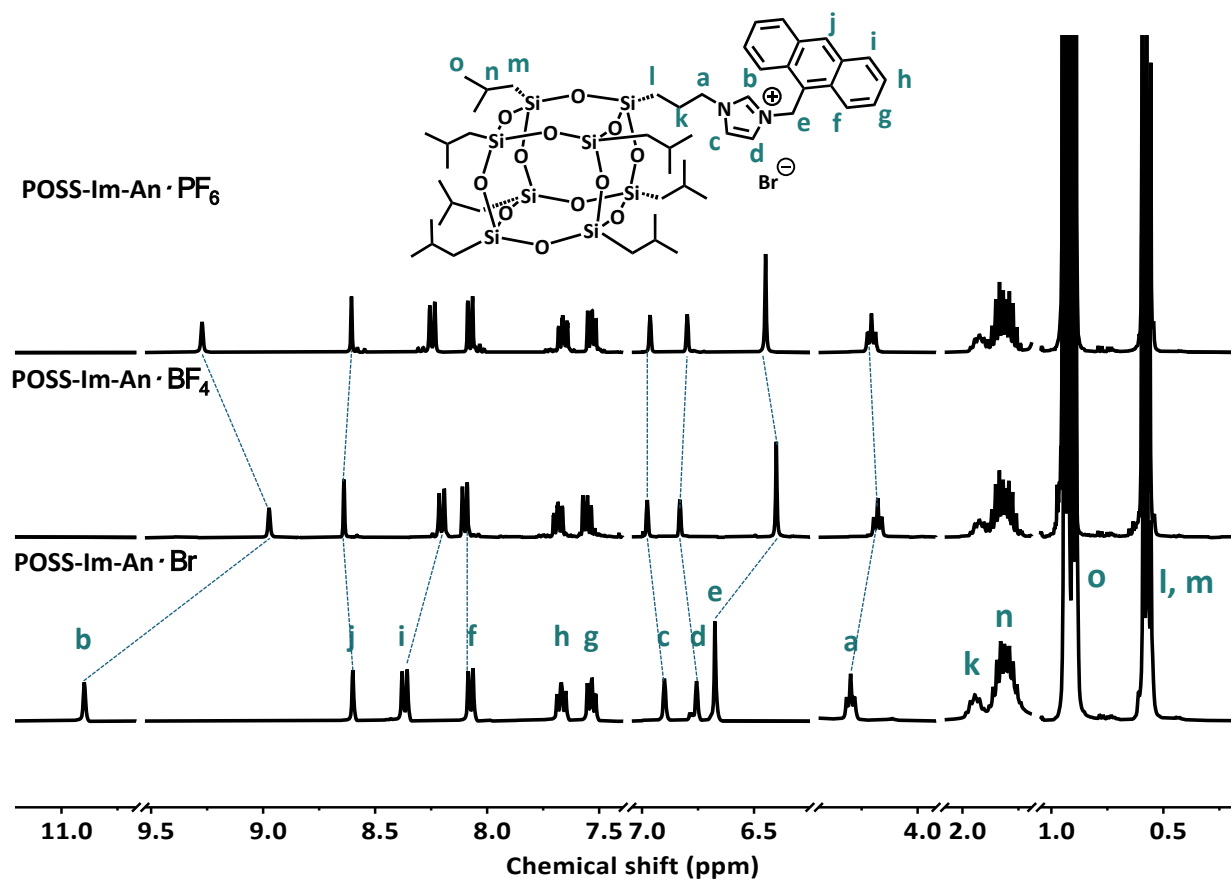

**Fig. S12** <sup>1</sup>H-NMR spectra of POSS-Im-An·Br, POSS-Im-An·BF<sub>4</sub>, and POSS-Im-An·PF<sub>6</sub> (400 MHz, CDCl<sub>3</sub>).

## Supporting Information

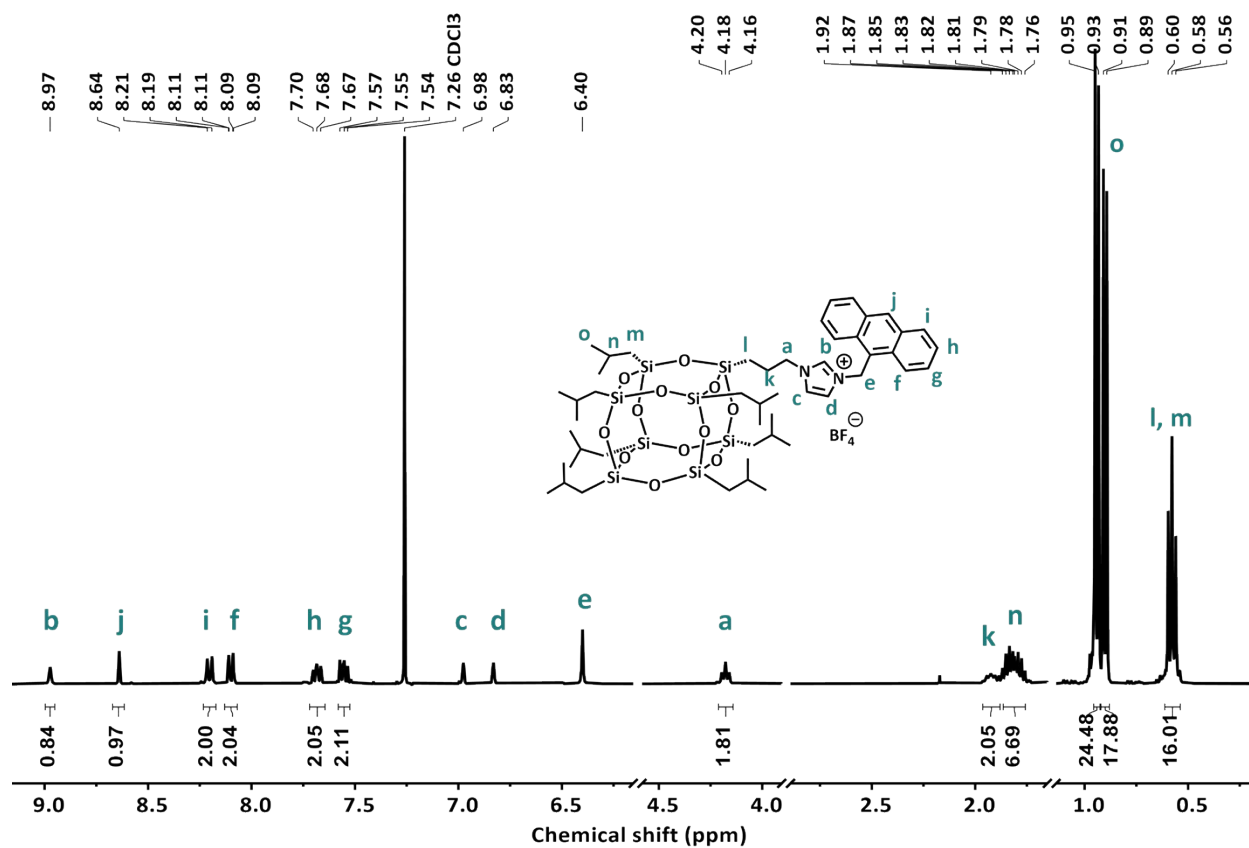

**Fig. S13**  $^1\text{H}$ -NMR spectrum of a POSS-Im-An·BF<sub>4</sub> (400 MHz, CDCl<sub>3</sub>).

# Supporting Information

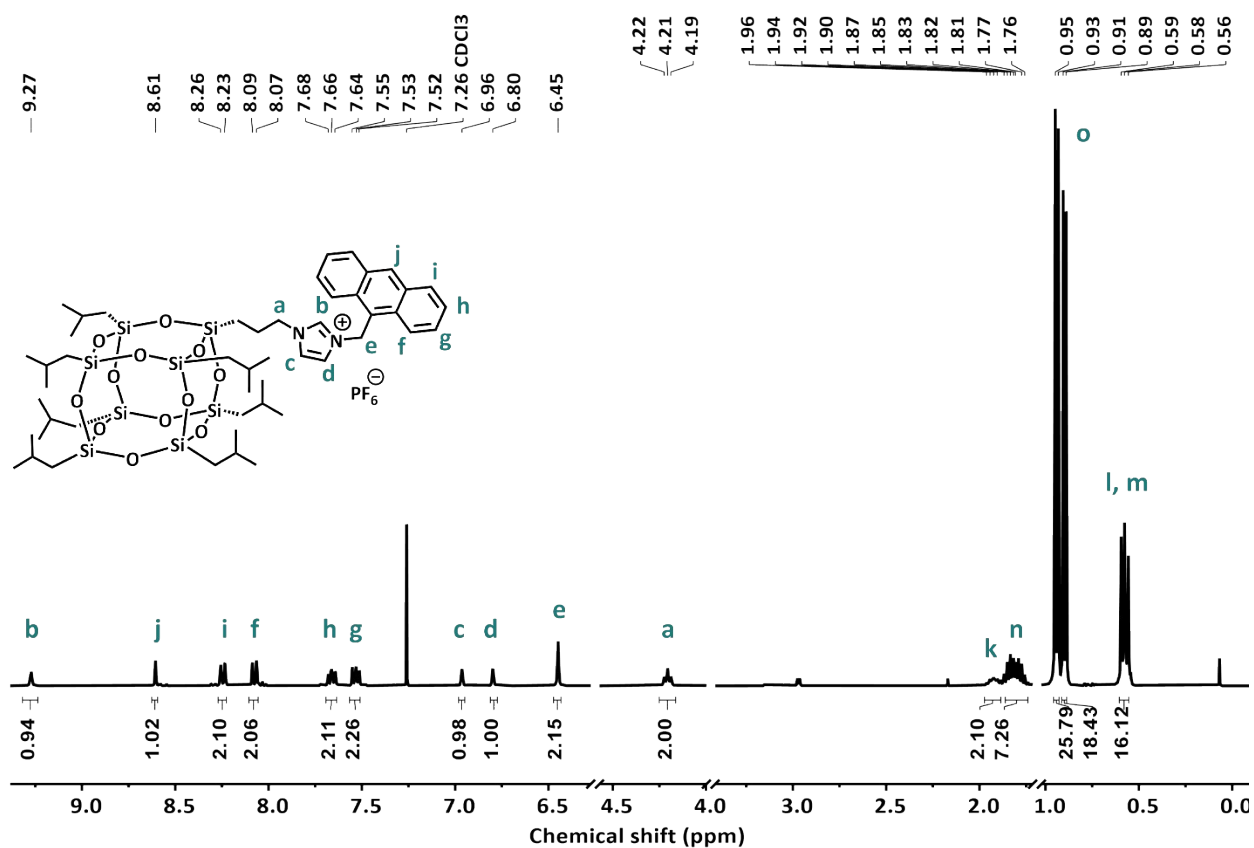

**Fig. S14** <sup>1</sup>H-NMR spectrum of a POSS-Im-An·PF<sub>6</sub> (400 MHz, CDCl<sub>3</sub>).

## Supporting Information

### Thermal Gravimetric Analysis (TGA)

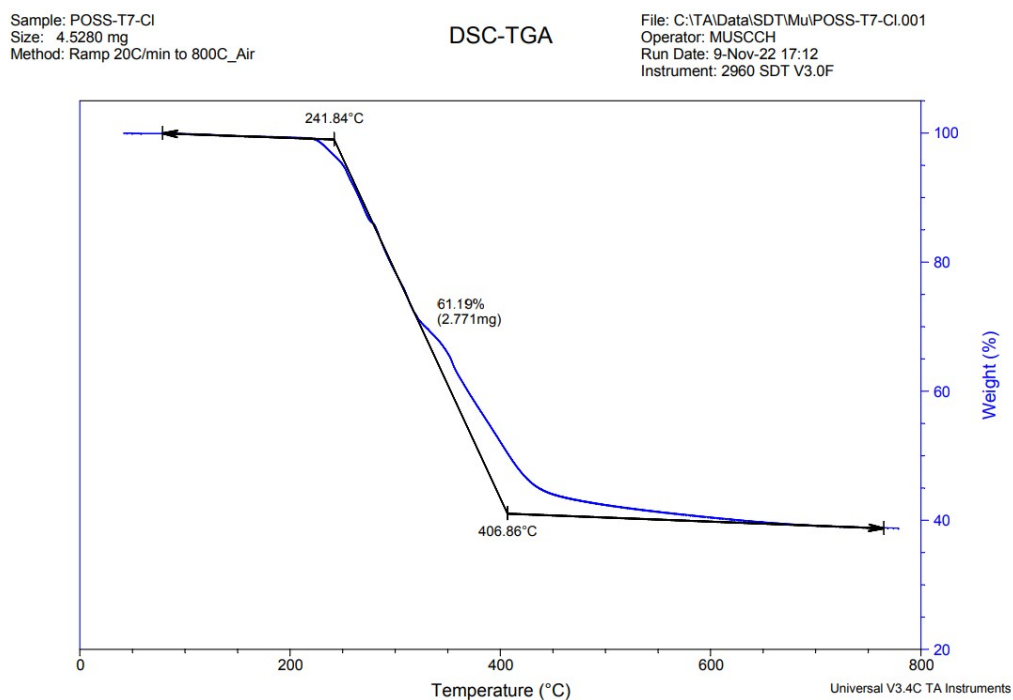

**Fig. S15** Thermal gravimetric analysis (TGA) of POSS-Cl under air.

## Supporting Information

Sample: POSS-imidazole  
Size: 6.6674 mg  
Method: Ramp 20C/min to 800C\_Air

DSC-TGA

File: C:\TA\Data\SDT\MulPOSS-imidazole.001  
Operator: MUSCCH  
Run Date: 8-Nov-22 10:33  
Instrument: 2960 SDT V3.0F

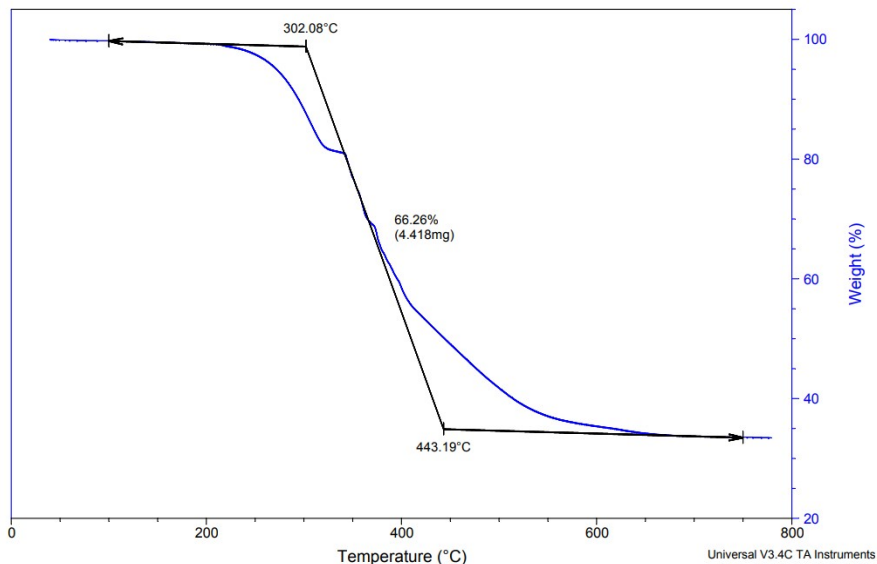

320

321 **Fig. S16** Thermal gravimetric analysis (TGA) of POSS-Im under air.

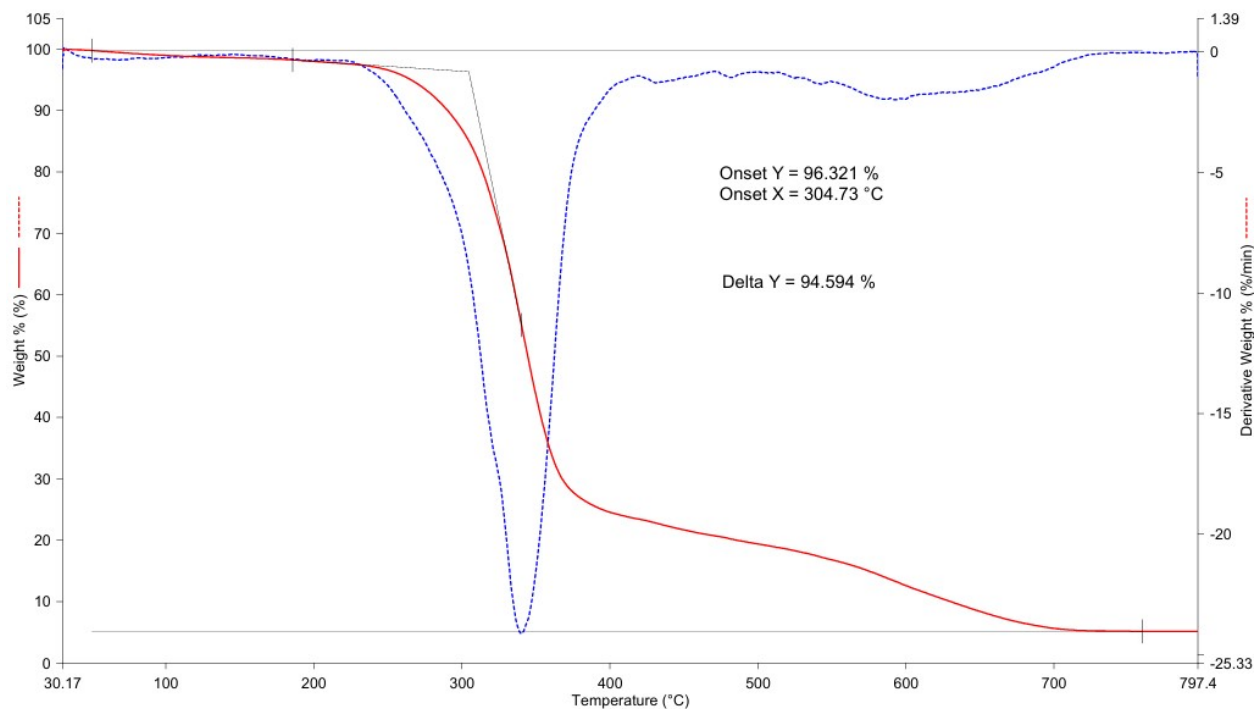

8/19/2025 11:20:58 AM

1) Hold for 1.0 min at 30.00°C  
2) Heat from 30.00°C to 800.00°C at 20.00°C/min  
3) Hold for 1.0 min at 800.00°C

322

323

324 **Fig. S17** Thermal gravimetric analysis (TGA) of POSS-Im-An·Br under air.



## Supporting Information

### Powder X-ray Diffraction Analysis (PXRD)

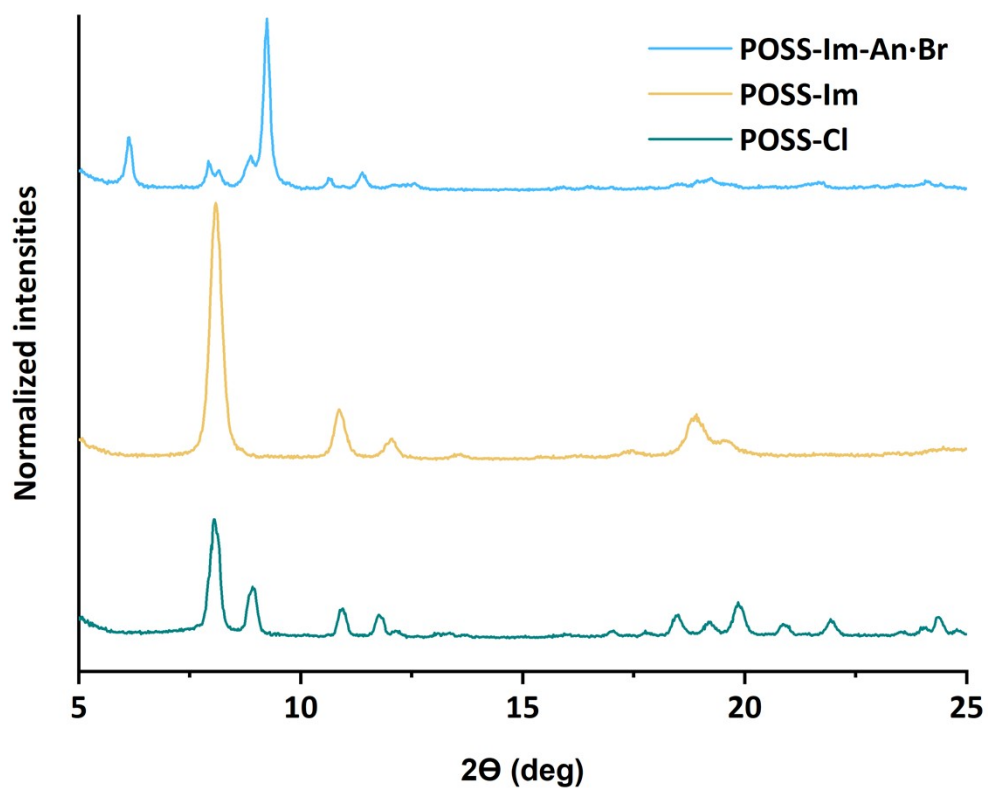

## Supporting Information

**Fig. S18** The comparison PXRD pattern of POSS-Cl, POSS-Im, and POSS-Im-An·Br.

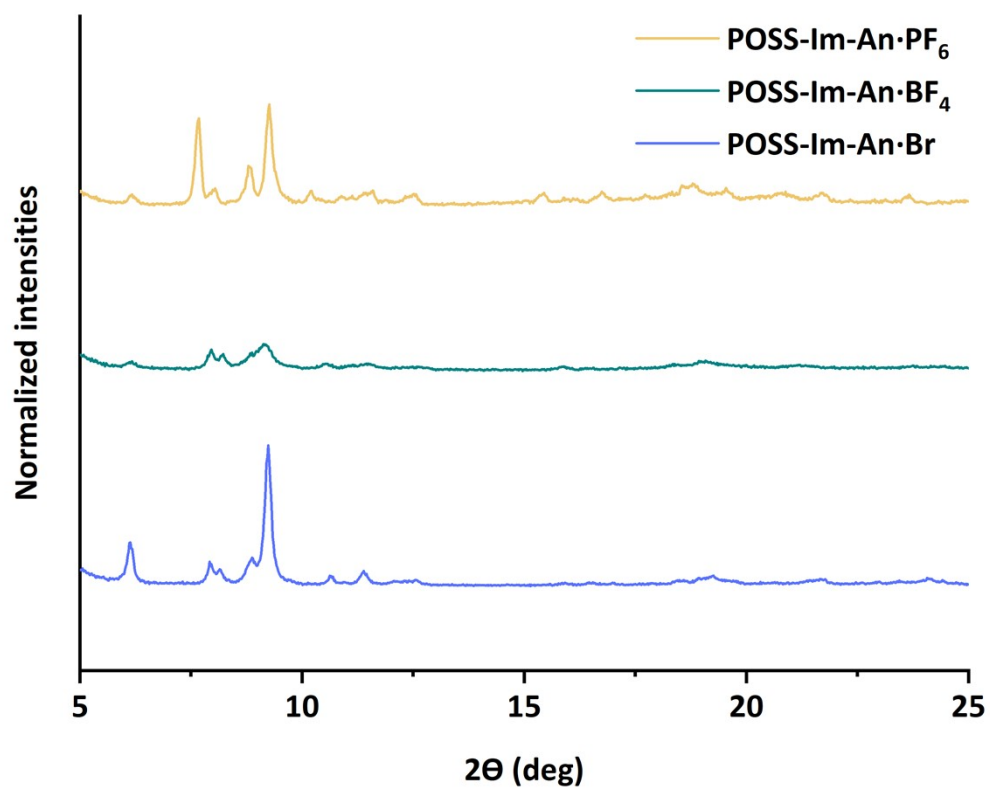

## Supporting Information

354 **Fig. S19** The comparison PXRD pattern of POSS-Im-An·Br, POSS-Im-An·BF<sub>4</sub>, and POSS-Im-  
355 An·PF<sub>6</sub>.

356

### 357 **Anion Exchange**

358 POSS-Im-An·Br (50 mg) was added to the vial, then 1:1 (CHCl<sub>3</sub>: H<sub>2</sub>O) into this vial.

359 Following, the excess of NaBF<sub>4</sub> and KPF<sub>6</sub> were added to each vial under the same conditions.

360 Then, each of the mixed solutions was extracted with CHCl<sub>3</sub>. The organics phase was kept and

361 washed with water to remove residual salt. After that, the organic phase evaporated and dried.

362 The final product was changed entirely to POSS-Im-An·BF<sub>4</sub> (NaBF<sub>4</sub>) and POSS-Im-

363 An·PF<sub>6</sub> (KPF<sub>6</sub>), which obtained the pale-yellow products. The change in anion products was

364 characterized using <sup>1</sup>H, <sup>13</sup>C, and <sup>19</sup>F-NMR.

365

366

### 367 **High Resolution Electrospray Ionization Mass Spectrometry (HR-ESI-MS)**

368

# Supporting Information

## Mass Spectrum List Report

### Analysis Info

Analysis Name VE\_CP\_T7-Cl.d  
Method Tune\_wide\_150-600\_NATTHAPAT2021.m  
Sample Name T7-Cl  
NATTHAPAT\_2022\_01\_08

Acquisition Date 1/8/2022 2:14:35 PM  
Operator Administrator  
Instrument micrOTOF 72

### Acquisition Parameter

Source Type ESI  
Scan Range n/a  
Scan Begin 50 m/z  
Scan End 3000 m/z  
Ion Polarity Positive  
Capillary Exit 180.0 V  
Hexapole RF 600.0 V  
Skimmer 1 70.0 V  
Hexapole 1 25.0 V

Set Corrector Fill 50 V  
Set Pulsar Pull 337 V  
Set Pulsar Push 337 V  
Set Reflector 1300 V  
Set Flight Tube 9000 V  
Set Detector TOF 2295 V

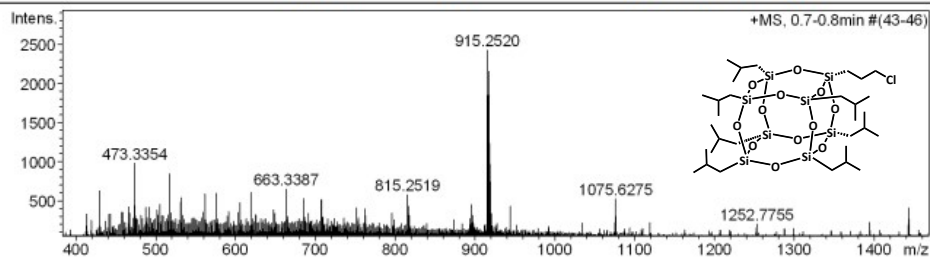

## Mass Spectrum List Report

### Analysis Info

Analysis Name VE\_CP\_Timi-up.d  
Method Tune\_wide\_130-400\_NATTHAPAT2021.m  
Sample Name Timi-up  
NATTHAPAT\_2022\_01\_12

Acquisition Date 1/12/2022 10:12:45 AM  
Operator Administrator  
Instrument micrOTOF 72

### Acquisition Parameter

Source Type ESI  
Scan Range n/a  
Scan Begin 50 m/z  
Scan End 3000 m/z  
Ion Polarity Positive  
Capillary Exit 150.0 V  
Hexapole RF 400.0 V  
Skimmer 1 70.0 V  
Hexapole 1 25.0 V

Set Corrector Fill 50 V  
Set Pulsar Pull 337 V  
Set Pulsar Push 337 V  
Set Reflector 1300 V  
Set Flight Tube 9000 V  
Set Detector TOF 2295 V

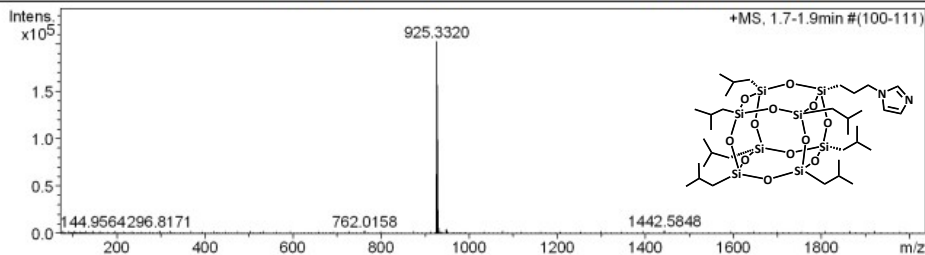

369

370

371 **Fig. S20** High resolution of ESI-MS spectrum of POSS-Cl dissolved in CH<sub>2</sub>Cl<sub>2</sub>, and POSS-Im  
372 dissolved in methanol.

373

374

# Supporting Information

## Mass Spectrum List Report

**Analysis Info**  
 Analysis Name D:\Data\SCMU\_DATA\SCNS\_11\_2023\02\VECP20231106\_Br1000001.d Acquisition Date 11/6/2023 3:33:24 PM  
 Method MUSCNS\_ESI\_POS1\_600-3000\_2023.m Operator Demo User  
 Sample Name CPSQBr1 Instrument compact 8255754.20333  
 Comment

### Acquisition Parameter

|             |            |                      |          |                  |           |
|-------------|------------|----------------------|----------|------------------|-----------|
| Source Type | ESI        | Ion Polarity         | Positive | Set Nebulizer    | 2.5 Bar   |
| Focus       | Not active | Set Capillary        | 3500 V   | Set Dry Heater   | 200 °C    |
| Scan Begin  | 500 m/z    | Set End Plate Offset | -500 V   | Set Dry Gas      | 4.0 l/min |
| Scan End    | 3000 m/z   | Set Charging Voltage | 2000 V   | Set Divert Valve | Source    |
|             |            | Set Corona           | 0 nA     | Set APCI Heater  | 0 °C      |

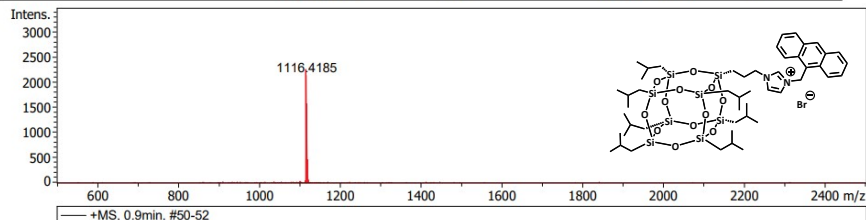

## Mass Spectrum List Report

**Analysis Info**  
 Analysis Name D:\Data\SCMU\_DATA\SCNS\_11\_2023\02\VECP20231106\_BF4000001.d Acquisition Date 11/6/2023 3:39:47 PM  
 Method MUSCNS\_ESI\_POS1\_600-3000\_2023.m Operator Demo User  
 Sample Name CPSQBF4 Instrument compact 8255754.20333  
 Comment

### Acquisition Parameter

|             |            |                      |          |                  |           |
|-------------|------------|----------------------|----------|------------------|-----------|
| Source Type | ESI        | Ion Polarity         | Positive | Set Nebulizer    | 2.5 Bar   |
| Focus       | Not active | Set Capillary        | 3500 V   | Set Dry Heater   | 200 °C    |
| Scan Begin  | 500 m/z    | Set End Plate Offset | -500 V   | Set Dry Gas      | 4.0 l/min |
| Scan End    | 3000 m/z   | Set Charging Voltage | 2000 V   | Set Divert Valve | Source    |
|             |            | Set Corona           | 0 nA     | Set APCI Heater  | 0 °C      |

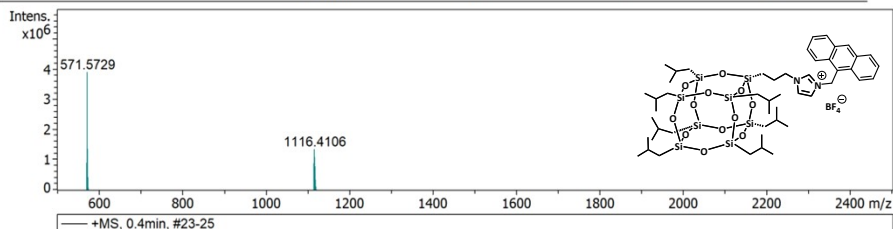

## Mass Spectrum List Report

**Analysis Info**  
 Analysis Name D:\Data\SCMU\_DATA\SCNS\_11\_2023\02\VECP20231106\_BF6000001.d Acquisition Date 11/6/2023 3:44:00 PM  
 Method MUSCNS\_ESI\_POS1\_600-3000\_2023.m Operator Demo User  
 Sample Name CPSQBF6 Instrument compact 8255754.20333  
 Comment

### Acquisition Parameter

|             |            |                      |          |                  |           |
|-------------|------------|----------------------|----------|------------------|-----------|
| Source Type | ESI        | Ion Polarity         | Positive | Set Nebulizer    | 2.5 Bar   |
| Focus       | Not active | Set Capillary        | 3500 V   | Set Dry Heater   | 200 °C    |
| Scan Begin  | 500 m/z    | Set End Plate Offset | -500 V   | Set Dry Gas      | 4.0 l/min |
| Scan End    | 3000 m/z   | Set Charging Voltage | 2000 V   | Set Divert Valve | Source    |
|             |            | Set Corona           | 0 nA     | Set APCI Heater  | 0 °C      |

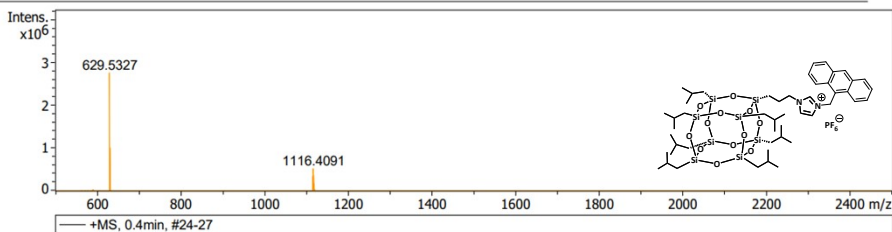

375

376

## Supporting Information

**Fig. S21** High resolution of the ESI-MS spectrum of changing counter anion dissolved in  $\text{CH}_2\text{Cl}_2$ .

### UV-Vis and Fluorescent Spectrophotometry Study

A  $1 \times 10^{-3}$  M stock solution of POSS-Im-An-Br was prepared in various solvents, including DMSO, MeOH, DMF, EtOH, MeCN, THF, and water. For UV-Visible and fluorescence spectroscopic measurements, the stock solution was diluted to  $1 \times 10^{-5}$  M and  $1 \times 10^{-6}$  M, respectively, for each solvent. Approximately 2 mL of each diluted solution was transferred into a cuvette for analysis. The UV-Visible absorption spectrum and the fluorescence emission spectra (FL intensity) were measured.

**Table S1** The conclusion of  $\lambda_{\text{Abs}}$  (nm) and  $\lambda_{\text{em}}$  (nm) in various solvents.

| Solvent                    | $\lambda_{\text{Abs}}$ (nm) | $\lambda_{\text{em}}$ (nm) |
|----------------------------|-----------------------------|----------------------------|
| Deionized water (DI water) | 351/368/388                 | 394/417/440                |
| Methanol (MeOH)            | 350/368/388                 | 392/415/440                |
| Ethanol (EtOH)             | 350/371/386                 | 393/416/439                |
| Acetonitrile (MeCN)        | 348/367/386                 | 392/415/440                |
| Dimethyl sulfoxide (DMSO)  | 353/371/391                 | 396/416/440                |
| Dimethylformamide (DMF)    | 350/369/389                 | 394/417/441                |
| Tetrahydrofuran (THF)      | 352/368/389                 | 394/416/440                |
| 15 % (v/v) water in DMSO   | 353/371/391                 | 396/419/440                |

## Supporting Information

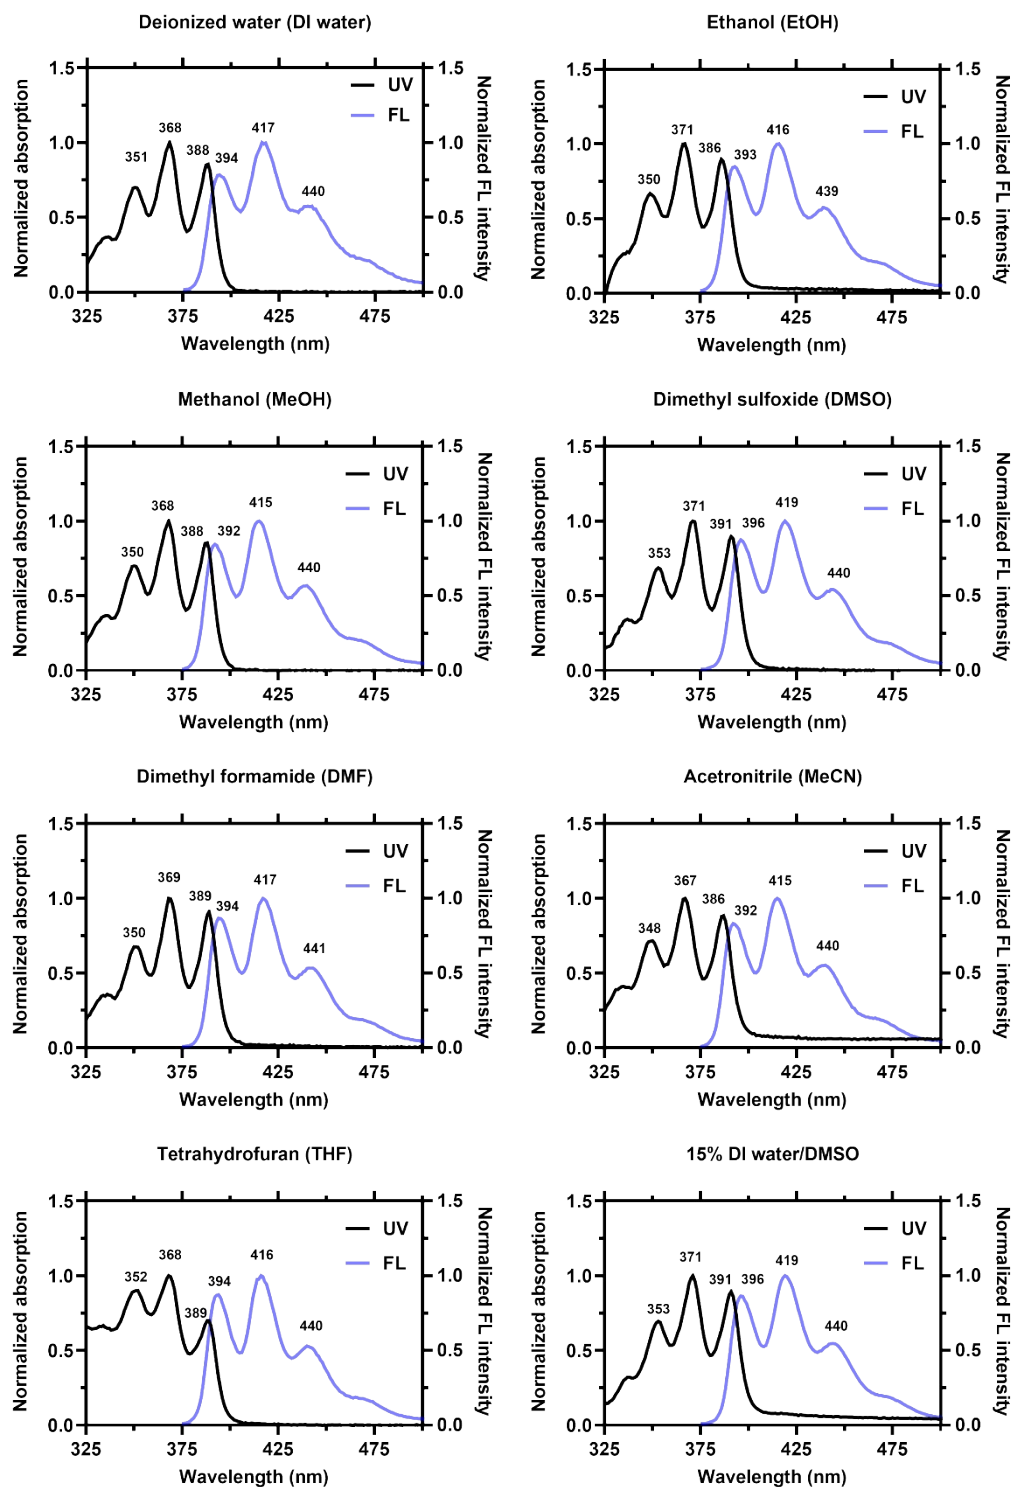

390

391

392 **Fig. S22** Normalized UV-Visible absorption spectra and fluorescent emission spectra of POSS-  
 393 Im-An·Br in various solvents.

## Supporting Information

### 394 Solid UV-Visible and Fluorescent Spectroscopy

395 The experiment involved placing POSS-Im-An·Br, POSS-Im-An·BF<sub>4</sub>, and POSS-Im-  
396 An·PF<sub>6</sub> samples (approximately 50 mg each) into a special holder for solid-state UV-Visible and  
397 fluorescence spectroscopy. In the UV-Visible spectroscopic measurements, the excitation  
398 maximum was observed within the range of 300–500 nm, while in the fluorescence  
399 measurements, the emission maximum appeared between 375–650 nm.

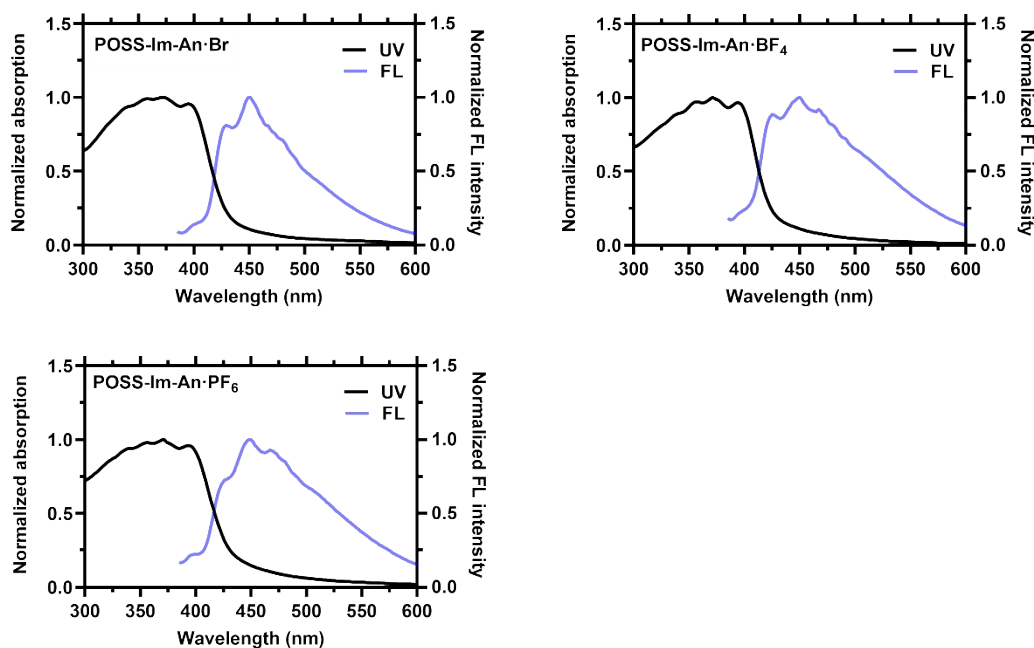

400

401 **Fig. S23** The normalized UV-Visible and fluorescence spectra of the solid-state of POSS-Im-  
402 An·Br, POSS-Im-An·BF<sub>4</sub>, and POSS-Im-An·PF<sub>6</sub>.

403

### 404 Effect of Water Content Study

405 To find the aggregation behavior of POSS-Im-An·Br after having water and the  
406 conditions for studying photophysical properties, selectivity, sensitivity, and quantitation. The  
407 water fraction in various ratios from 0 to 100 % (v/v) of Deionized water in DMSO was prepared  
408 as  $1 \times 10^{-3}$  M of POSS-Im-An·Br stock solution. Then, each stock solution was diluted to  $1 \times 10^{-6}$   
409 M. The 2 mL of dilution was pipetted and added to the cuvette. After this, the samples were  
410 recorded by fluorescence spectroscopy and photographed. The results demonstrate a change in  
411 fluorescence emission spectrum in different water contents in DMSO.



## Supporting Information

### Fluorescence Titration

The POSS-Im-An·Br solution in 15% (v/v) water in DMSO ( $1 \times 10^{-6}$  M) was pipetted into a cuvette, and the stock solution of analytes ( $1 \times 10^{-5}$  M) that included NPY, PCA, NNP, ACA, NAA, PA, and DNP was added with 5 equiv., per time. After that, the fluorescence emission spectrum was recorded. The photographs were taken with the naked eye using a mobile phone.

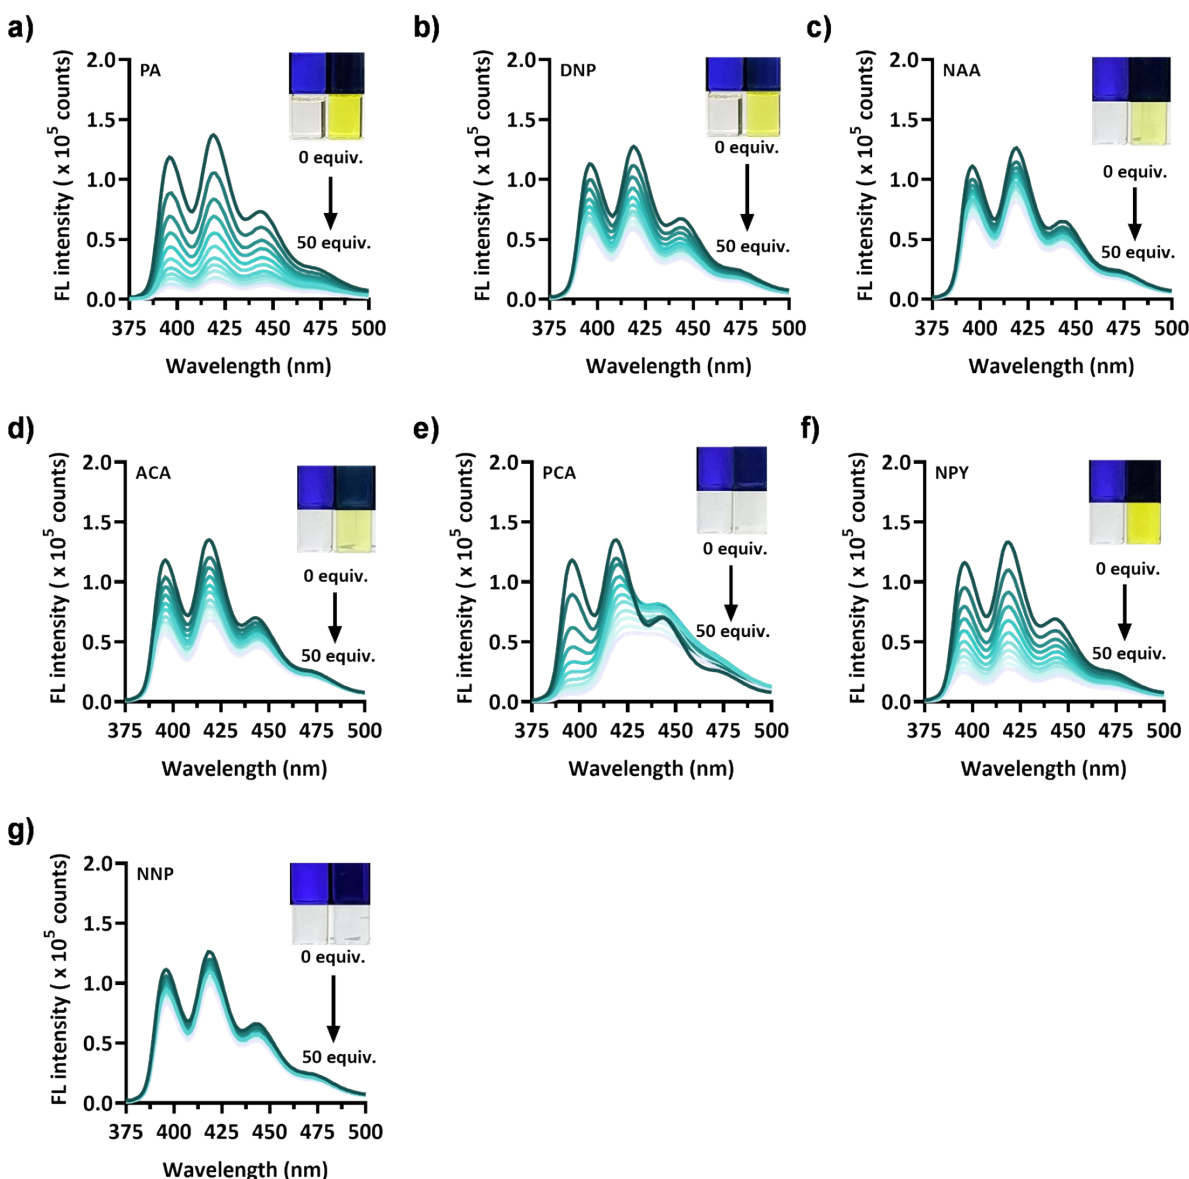

418

419 **Fig. S24** Fluorescence titration spectra of POSS-Im-An·Br with a) PA, b) DNP, c) NAA, d)  
420 ACA, e) PCA, f) NPY, and g) NNP in 15% (v/v) water in DMSO.

## Supporting Information

421

### 422 Quantitative Analysis

423 To estimate fluorescence quenching, binding affinity, and detection limit of POSS-Im-  
 424 An·Br in various analytes. Quantitative parameters, including the limit of detection (LOD), limit  
 425 of quantitation (LOQ), Stern–Volmer rate constant ( $K_{sv}$ ), and binding constant ( $K_a$ ), were  
 426 determined from fluorescence titration and calculated by following graph plotting between FL  
 427 intensity and concentration of each analyte, the Stern–Volmer equation, and the Benesi–  
 428 Hildebrand equation, respectively, as concluded in Table 1.<sup>5</sup>

### 429 Measurement of Stern-Volmer rate ( $K_{sv}$ )

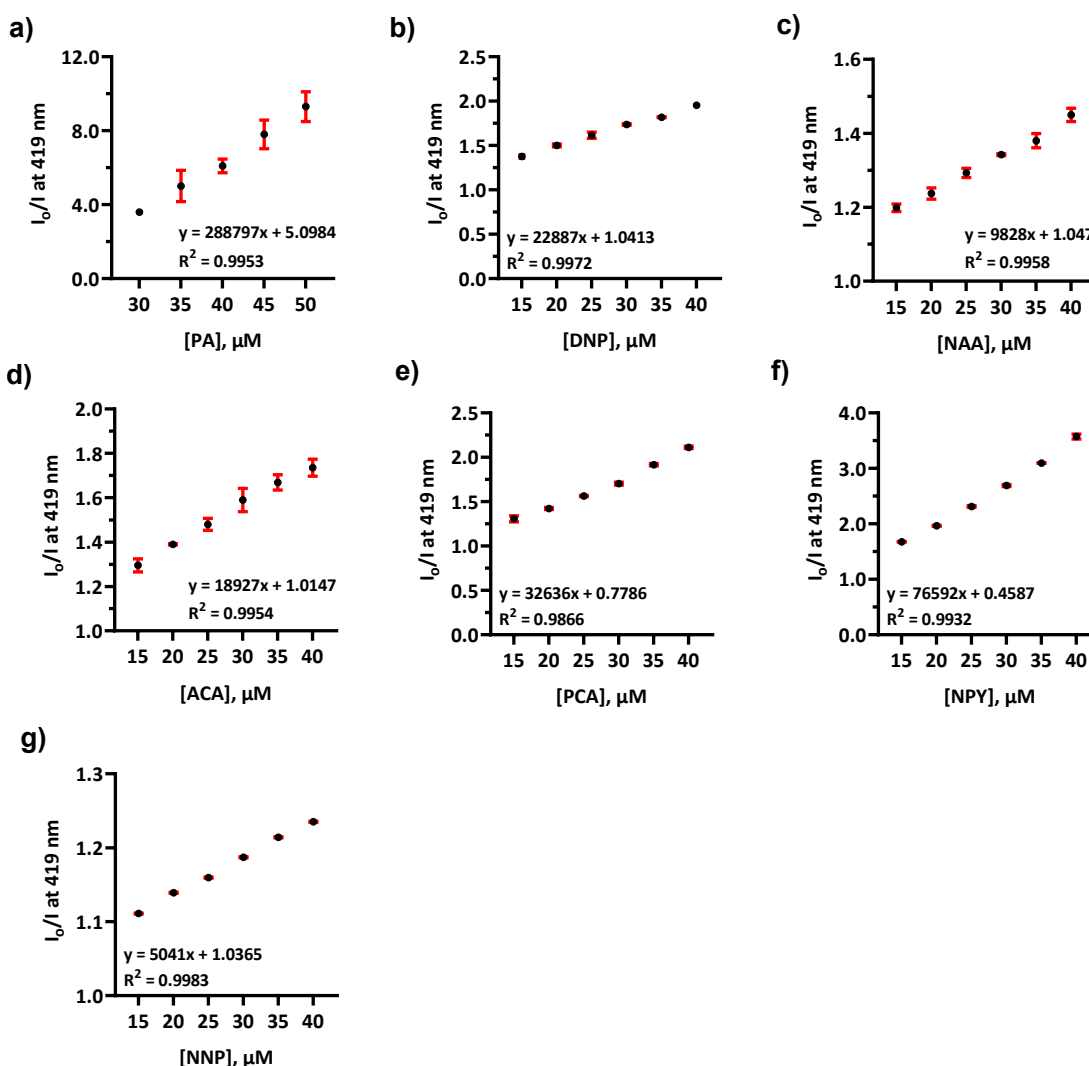

430

431 **Fig. S25** Stern–Volmer (SV) plots of POSS-Im-An·Br with a) PA, b) DNP, c) NAA, d) ACA, e)  
 432 PCA, f) NPY, and g) NNP in 15% (v/v) water in DMSO were obtained from fluorescent  
 433 emission at  $\lambda_{em} = 419$  nm, and the Stern–Volmer constants ( $K_{sv}$ ) are summarized in Table 1.

## Supporting Information

### 434 Measurement of the binding constant ( $K_a$ )

435 The association constant ( $K_a$ ) was calculated according to the Benesi–Hildebrand  
436 equation as follows: fluorescence experiment.

$$\frac{1}{I - I_0} = \frac{1}{K(I_{\max} - I_0)[A]} + \frac{1}{(I_{\max} - I_0)}$$

437  $I_0$  is the fluorescence intensity of the solution in the absence of analytes (A),  $I$  is the  
438 fluorescence record in the presence of analytes, and  $I_{\max}$  is the fluorescence in the addition of  
439  $[A]_{\max}$ . The association constant ( $K_a$ ) could be calculated from the slope of a straight-line plot  
440 between  $1/(I - I_0)$  against  $1/[A]$ .

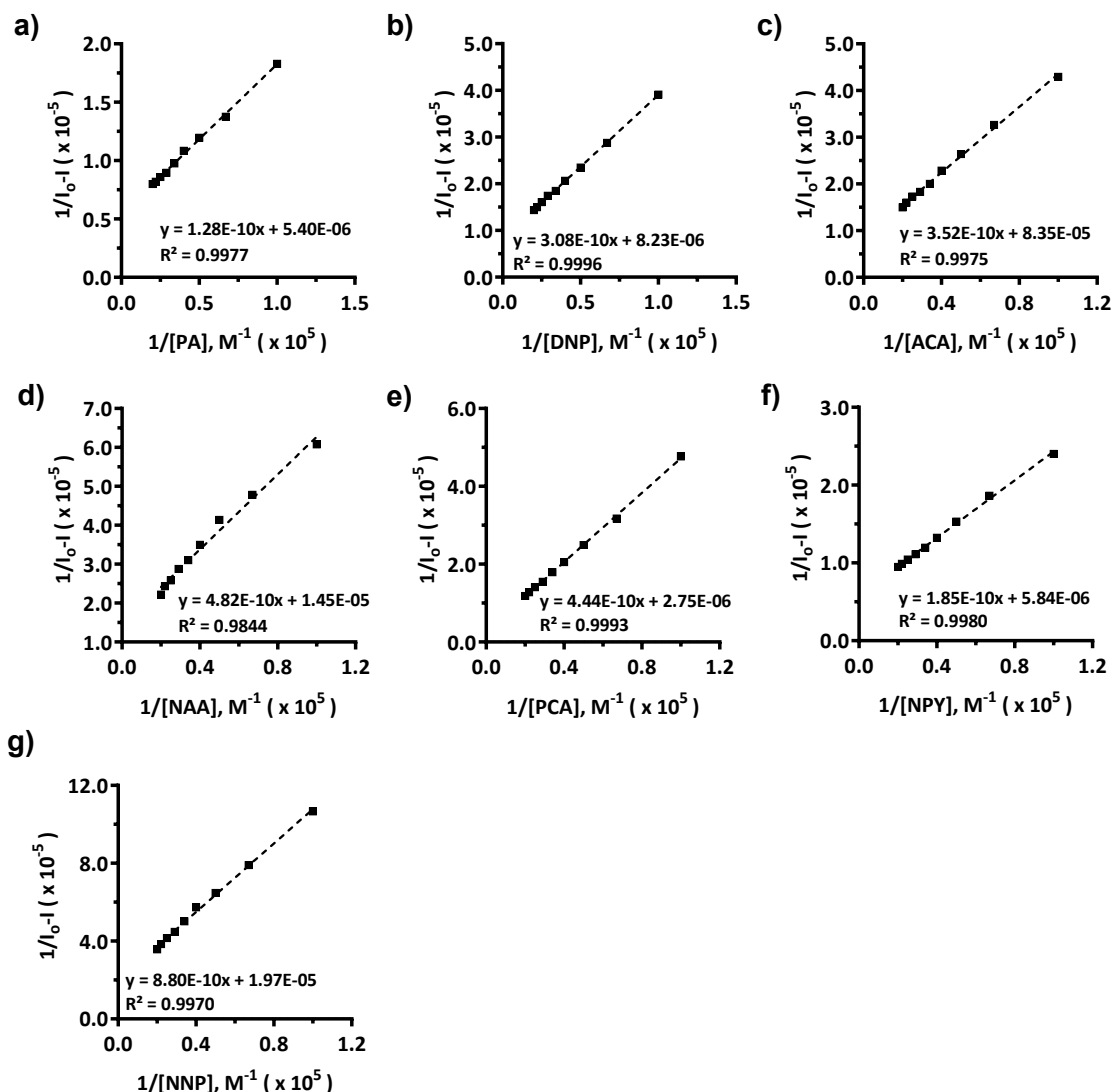

441

442 **Fig. S26** Benesi–Hildebrand plot of POSS-Im-An·Br with a) PA, b) DNP, c) ACA, d) NAA, e)  
443 PCA, f) NPY, and g) NNP in 15%DI water/DMSO condition from fluorescent emission at  $\lambda_{\text{em}} =$   
444 419 nm, and binding constant ( $K_a$ ) as concluded in Table 1.

## Supporting Information

### Measurement of the limit of detection (LOD) and limit of quantification (LOQ)

The limit of detection (LOD) and limit of quantification (LOQ) were determined from fluorescence titration experiments using the following equations:

$$\text{LOD} = 3\sigma/S$$

$$\text{LOQ} = 10\sigma/S$$

where  $\sigma$  represents the standard deviation of the response, and  $S$  denotes the slope of the calibration curve.

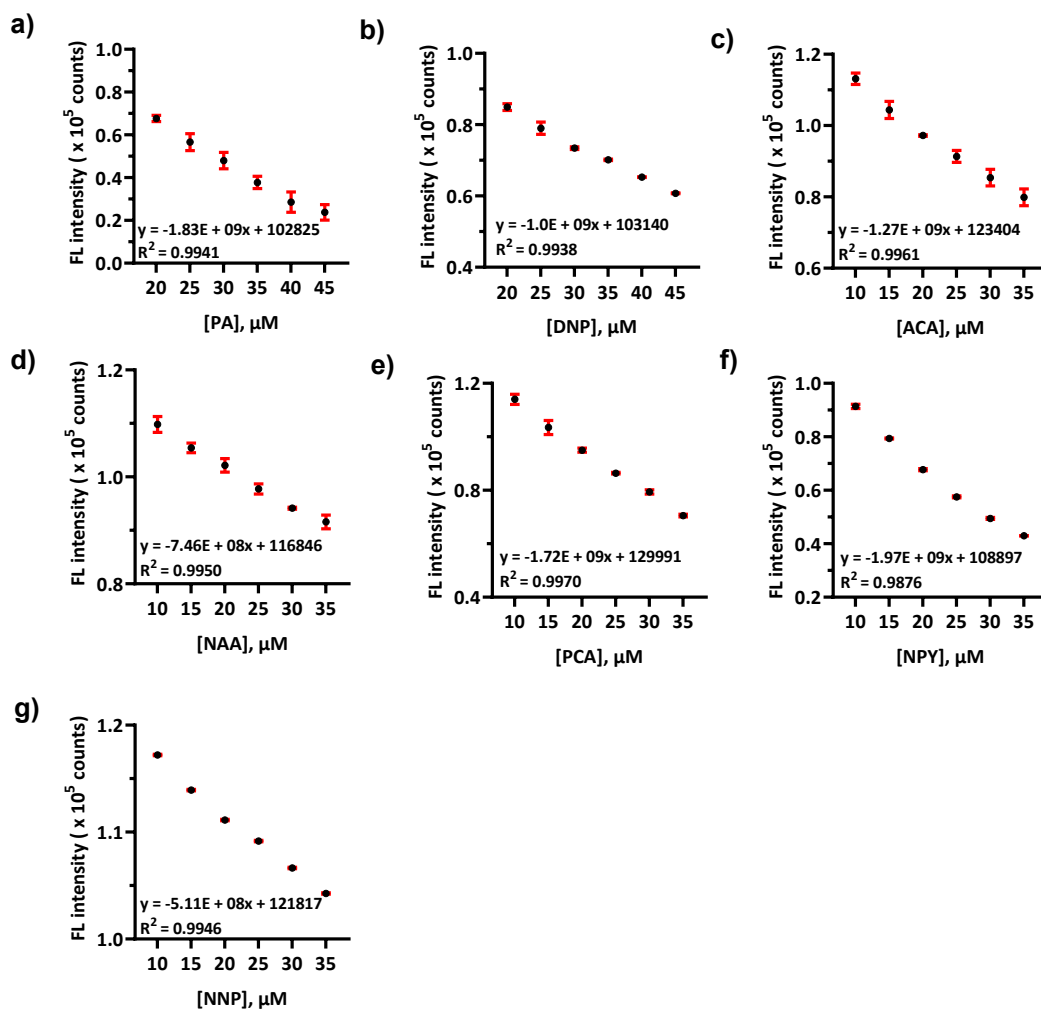

**Fig. S27** The fluorescence intensity of POSS-Im-An·Br ( $1 \times 10^{-6}$  M) versus a) PA, b) DNP, c) ACA, d) NAA, e) PCA, f) NPY, and g) NNP concentration ( $1 \times 10^{-4}$  M) at  $\lambda_{em} = 419$  nm in 15% (v/v) water/DMSO.

## Supporting Information

### 459 Selectivity Test

460 To assess changes in fluorescence emission for various analytes, fluorescence  
461 spectroscopy was employed, and observations were also made visually with the eye. The results  
462 were recorded in a fluorescence emission spectrum (Fig. S28) and documented with photographs  
463 taken under UV light of the sensor exposed to different analytes (Fig. S29). For measuring the  
464 selectivity of POSS-Im-An·Br toward NACs and PAHs, 2 mL of POSS-Im-An·Br solution  
465 ( $1 \times 10^{-6}$  M) in 15% (v/v) water in DMSO was pipetted into a cuvette and a vial. Subsequently,  
466 50 equiv. of each analyte stock solution ( $1 \times 10^{-4}$  M in 15% (v/v) water in DMSO) were added to  
467 the sensor using a microsyringe. The mixture was stirred for 2 minutes before recording the  
468 fluorescence spectra. Additionally, photographs of these samples were taken under UV light  
469 using a smartphone for visual comparison.

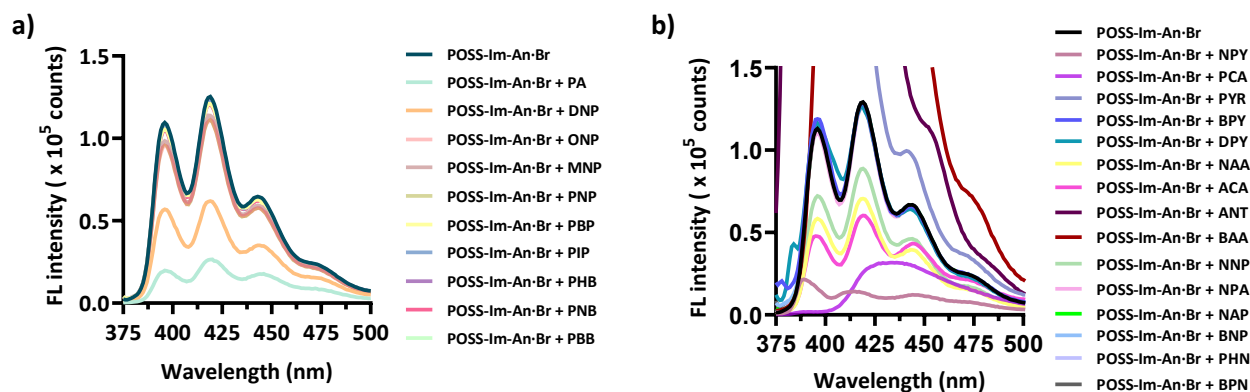

471 **Fig. S28** Selectivity of POSS-Im-An·Br at  $1 \times 10^{-6}$  M with different a) NACs and b) PAHs in  
472 15% (v/v) water in DMSO.

473

474

475

476

477

478

479

## Supporting Information

480

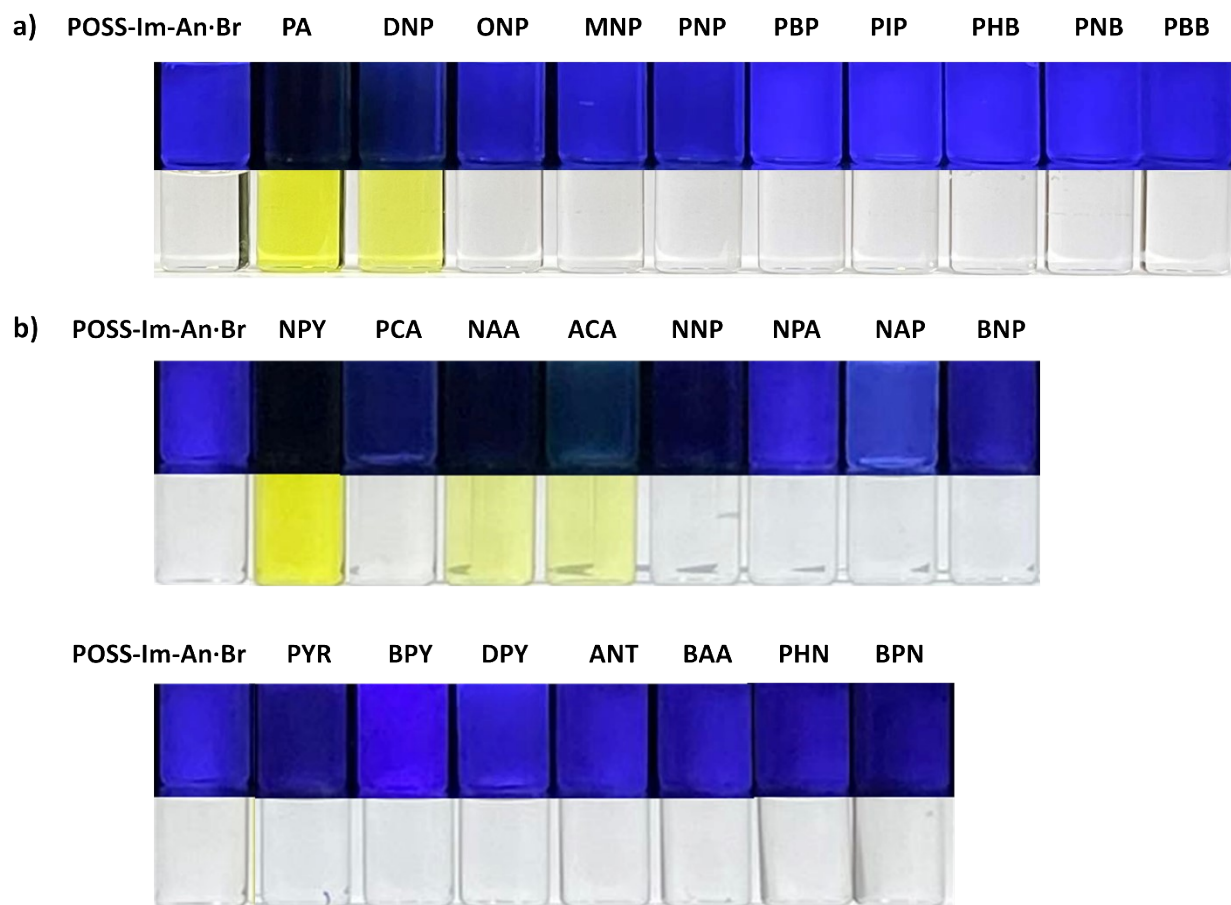

481

482 **Fig. S29** The photographs of the POSS-Im-An·Br ( $1 \times 10^{-6}$  M) in 15% (v/v) water in DMSO  
 483 with a) NACs and b) PAHs 50 equiv. per time ( $1 \times 10^{-3}$  M) recorded in room light and under UV  
 484 light at 365 nm.

485

486

## Supporting Information

487 **Table S2** Comparison of fluorescence-based sensors reported for the detection of PA and DNP, and selected PAH derivatives.

| System                                                          | Target analytes          | LOD ( $\mu\text{M}$ ) | $K_{\text{sv}}$ ( $\text{M}^{-1}$ )      | Solvent                          | Ref.      |
|-----------------------------------------------------------------|--------------------------|-----------------------|------------------------------------------|----------------------------------|-----------|
| POSS-Im-An·Br                                                   | PA/DNP                   | 0.72 / 0.64           | $2.89 \times 10^5$ / $2.29 \times 10^4$  | 15 % (v/v) H <sub>2</sub> O/DMSO | This work |
| Fluoranthene based fluorescent sensor                           | PA                       | 0.87                  | $9.9 \times 10^4$                        | EtOH                             | 6         |
| Coumarin based                                                  | PA                       | 0.62                  | $1.22 \times 10^4$                       | 30 % (v/v) DMF/H <sub>2</sub> O  | 7         |
| Pyridine-based                                                  | PA                       | 1.75                  | $4.10^6$                                 | THF                              | 8         |
| Metal complex-based fluorescent                                 | PA/DNP                   | 1.85/2.21             | $3.5 \times 10^4$ / $5.55 \times 10^4$   | MeOH                             | 9         |
| AIEE active copolymer Dioctylfluorene bis(1,3-propandiol) ester | PA                       | 2.8                   | $4.960 \times 10^3$                      | THF                              | 10        |
| Zn(II)-based MOFs<br>(1)<br>(2)                                 | PA                       | 3.5<br>1.8            | $1.53 \times 10^4$<br>$3.11 \times 10^4$ | 75 % (v/v) DMF/H <sub>2</sub> O  | 11        |
| Hyperbranched poly(silylenephenylene)                           | PA                       | 4.3                   | $1.5 \times 10^5$                        | THF/H <sub>2</sub> O             | 12        |
| Dabsyl derivative                                               | PA                       | 7.2                   | *                                        | MeCN                             | 13        |
| Poly-alizarin red S/carbon paste electrode                      | Anthracene, Phenanthrene | 24                    | *                                        | Water                            | 14        |
| Conjugated-polymer fluorescence sensor array                    | Anthracene (example)     | 2.4                   | *                                        | DMF                              | 15        |
| Graphite nanowall flexible electrochemical sensor               | Anthracene               | 100–350               | *                                        | MeCN/Water                       | 16        |

488 \* No data reported

# Supporting Information

## 489 Response Time Study

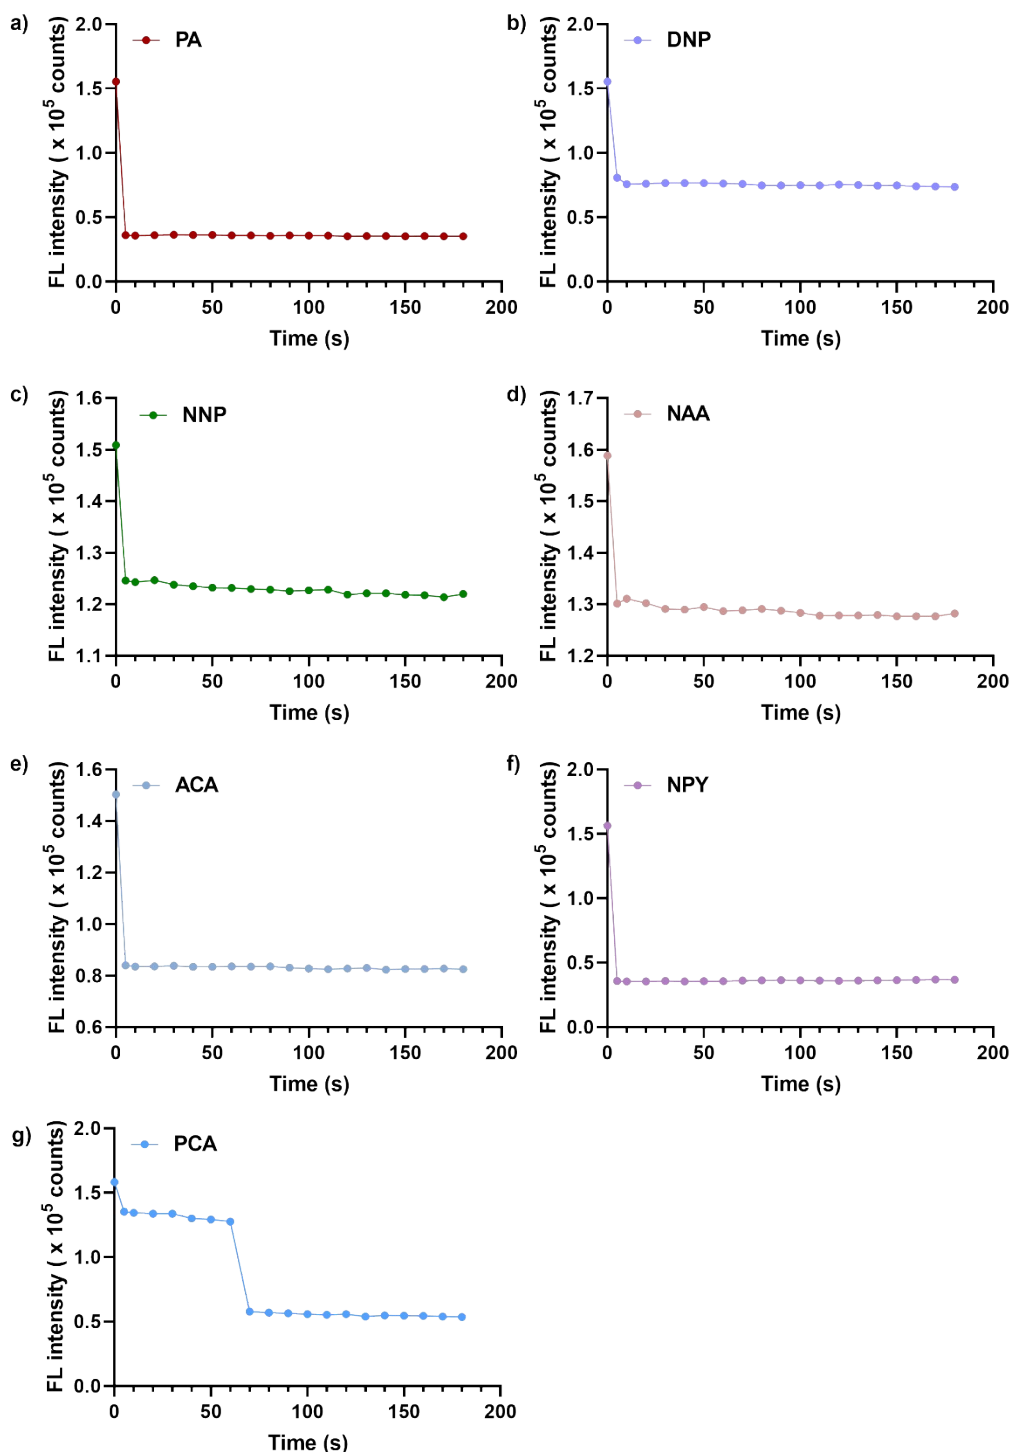

490

491 **Fig. S30** Time-dependent fluorescence intensity changes of POSS-Im-An·Br ( $1 \times 10^{-6}$  M) upon  
 492 the addition of 50 equiv. of PA (a), DNP (b), NNP (c), NAA (d), ACA (e), NPY (f), and PCA (g)  
 493 in 15% (v/v) water/DMSO were monitored at 419 nm from 0 to 180 s.



## Supporting Information

### 494 Binding Stoichiometry Analysis (Job's plot)

495 Stock solutions of POSS-Im-An·Br ( $1.0 \times 10^{-3}$  M) and the analyte ( $5.0 \times 10^{-3}$  M) were  
 496 prepared in 15% (v/v) water/DMSO. Job's plot analyses were performed using the continuous  
 497 variation method, where the host and guest solutions were mixed in varying mole fractions while  
 498 maintaining a constant total concentration of  $1.0 \times 10^{-6}$  M. Fluorescence spectra were recorded  
 499 under identical conditions. The Job's plots were constructed by plotting  $\Delta F \times X_h$  versus  $X_h$ ,  
 500 where  $\Delta F$  is the change in fluorescence intensity relative to the free host, and  $X_h$  is the mole  
 501 fraction of the host.

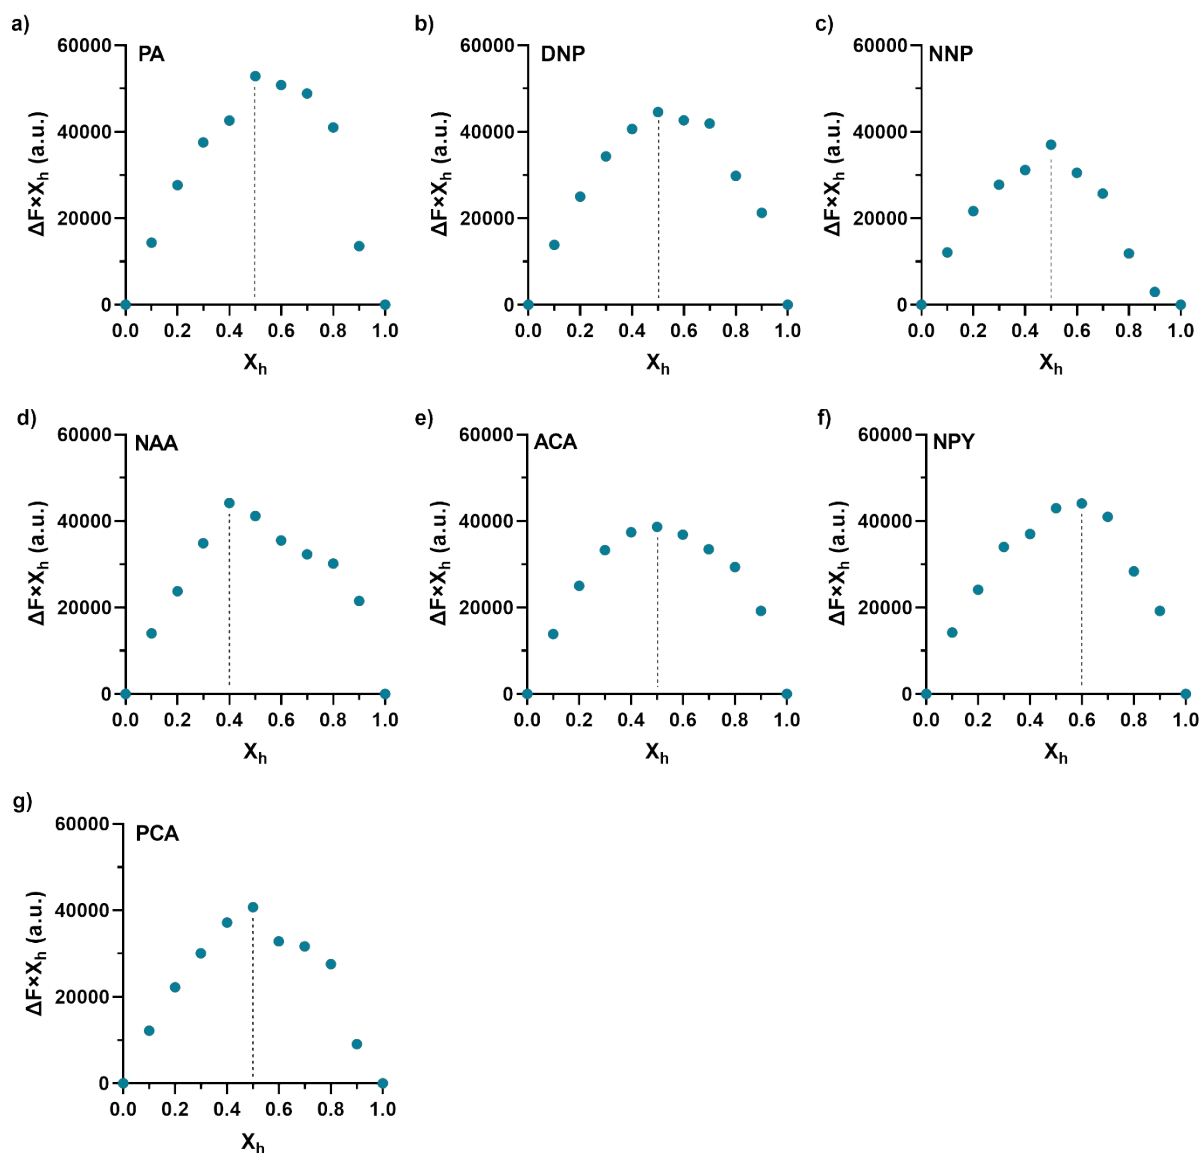

502

503 **Fig. S31** Job's plot for POSS-Im-An·Br with PA (a), DNP (b), NNP (c), NAA (d), ACA (e),  
 504 NPY (f), and PCA (g) at a constant total concentration of  $1 \times 10^{-6}$  M in 15% (v/v) water/DMSO.

505

## Supporting Information

### 506 Determination of Quantum Fluorescence Yield

507 The quantum efficiency ( $\Phi_p$ ) of POSS-Im-An·Br was measured using fluorescence  
508 spectroscopy under the following conditions: slit width of 3 nm, integration time of 1 second,  
509 and a BaO-coated spherical cuvette. To perform the measurement, 2 mL of the sensor solution  
510 was added to the cuvette, which was then covered with the spherical cube. The quantum yield  
511 was calculated using the following equation, based on comparison between the solvent and the  
512 sensor solution, with corrections applied for the spherical cuvette (from Horiba specifications):

$$\frac{\Delta \text{ area under emission curve}}{\Delta \text{ area under absorption curve}}$$

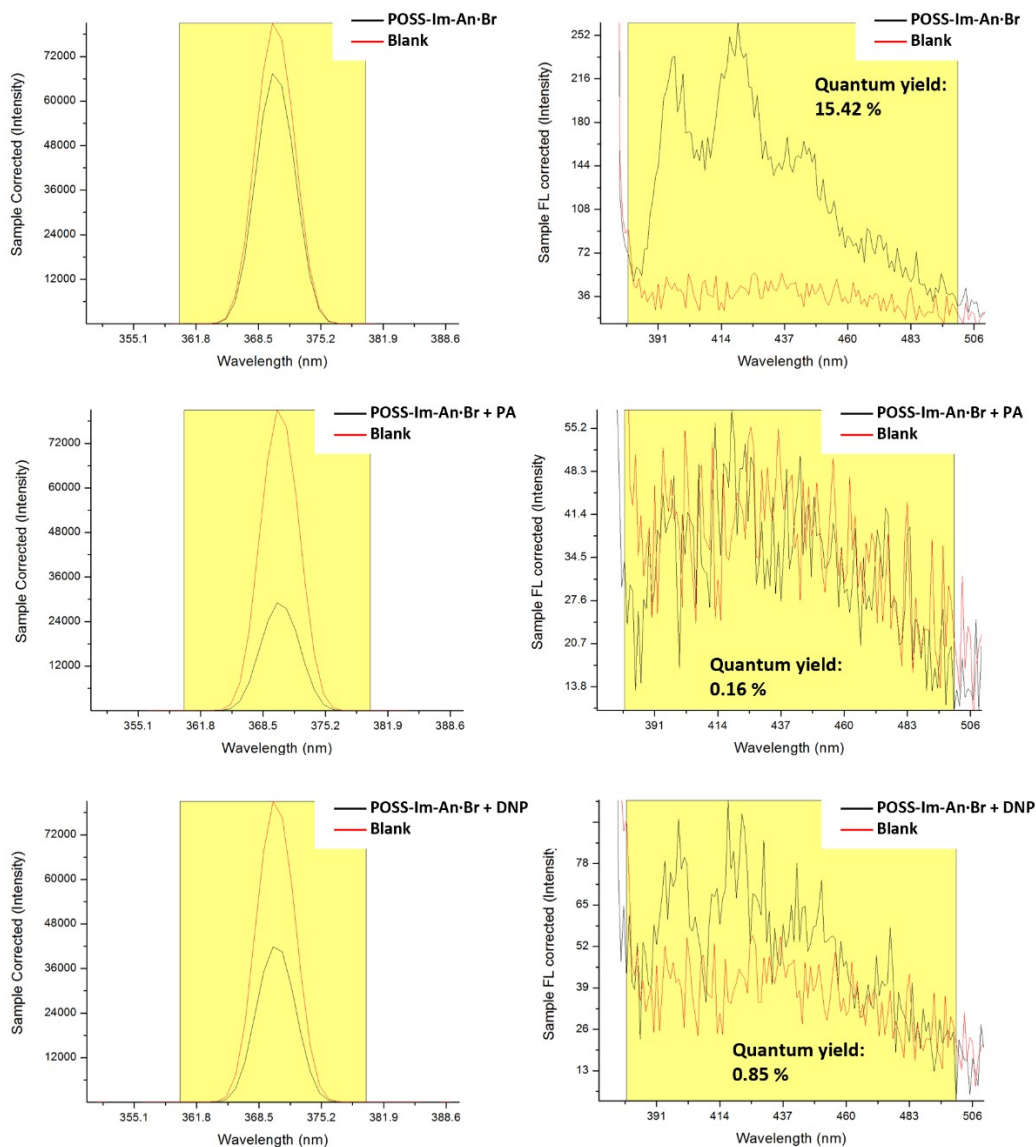

514  
515 **Fig. S32** The quantum efficiency was measured for 2 mL of POSS-Im-An·Br ( $1 \times 10^{-6}$  M) in the  
516 presence of 25 equiv. of PA and DNP ( $1 \times 10^{-4}$  M) in 15% (v/v) water/DMSO.

# Supporting Information

517

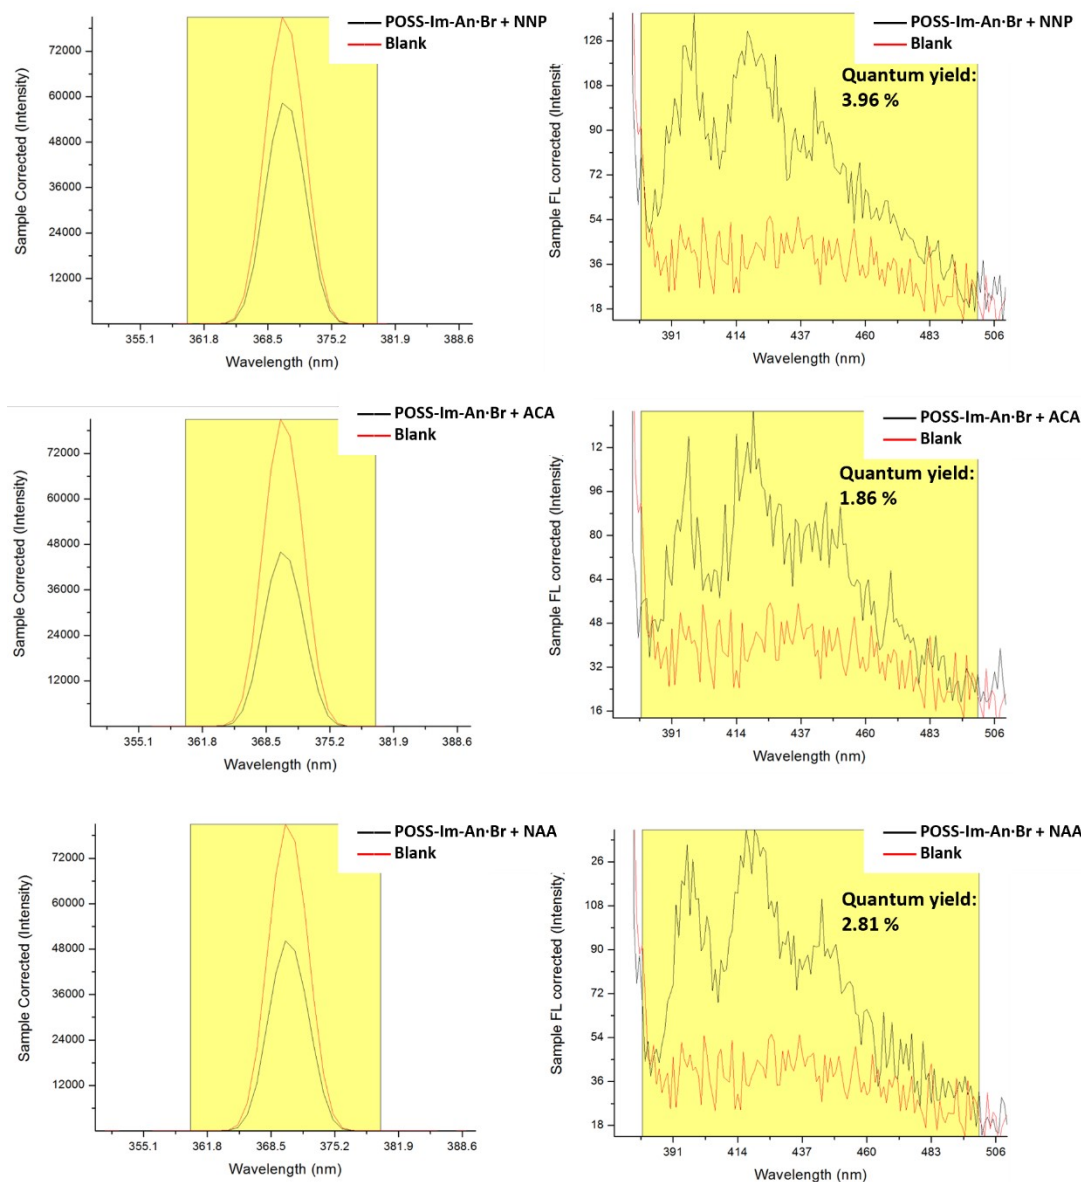

518

519 **Fig. S33** Quantum efficiency of 2 mL of POSS-Im-An-Br ( $1 \times 10^{-6}$  M) in the presence of 25  
 520 equiv. of NNP, ACA, and NAA ( $1 \times 10^{-4}$  M) in 15% (v/v) water/DMSO.

521

522

523

524

525

## Supporting Information

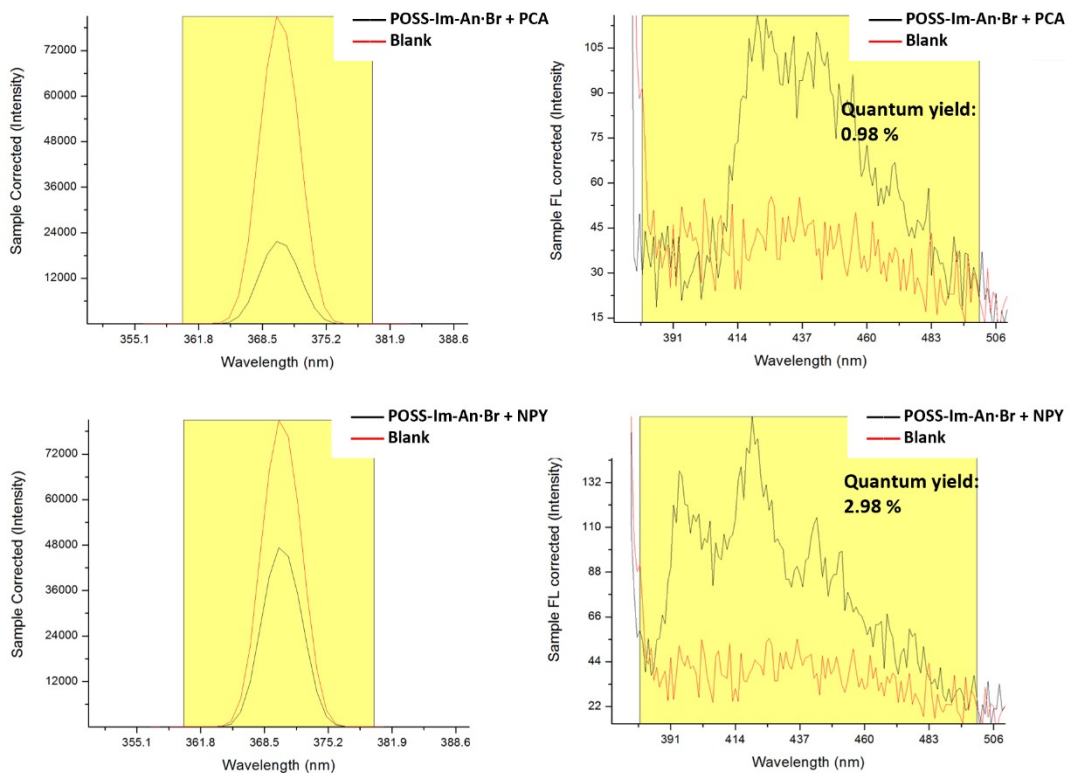

**Fig. S34** Quantum efficiency of 2 mL of POSS-Im-An-Br ( $1 \times 10^{-6}$  M) in the presence of 25 equiv. of PCA and NPY ( $1 \times 10^{-4}$  M) in 15% (v/v) water/DMSO.

## Supporting Information

### 541 The Effect of Ionic Strength

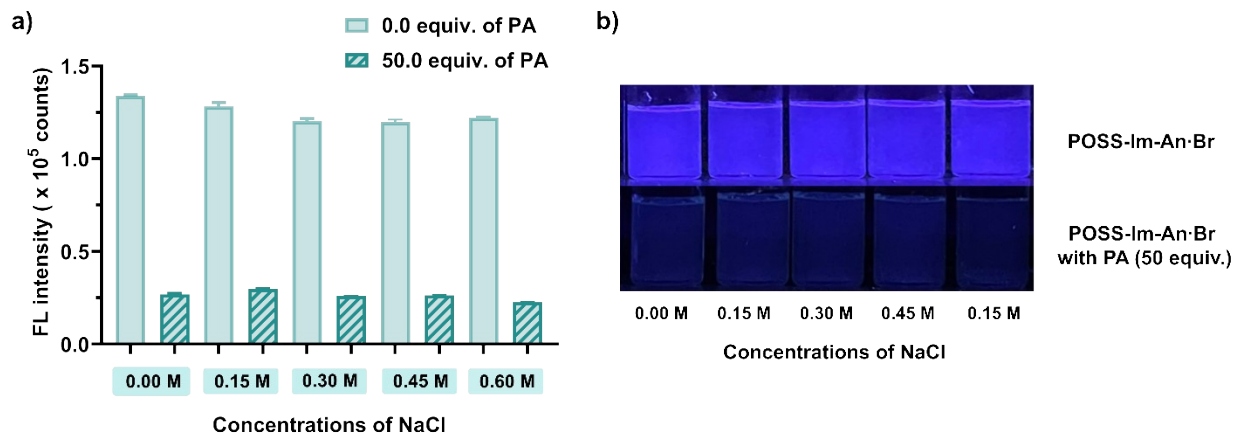

542

543 **Fig. S35** (a) Fluorescence emission signals of POSS-Im-An·Br ( $1 \times 10^{-6}$ ) in 15% (v/v)  
 544 water/DMSO, in the presence and absence of 50.0 equiv. of PA, with 100  $\mu$ L of different NaCl  
 545 concentrations. (b) Photographs of POSS-Im-An·Br in the presence and absence of 50.0 equiv. of  
 546 PA in 100  $\mu$ L of different NaCl concentrations, under UV light at 365 nm.

547

548

549

550

551

552

553

554

555

556

557

558

559

560

## Supporting Information

### 561 Anti-interference studies and real water sample analysis

562 Stock solutions ( $5 \times 10^{-3}$  M) of inorganic salts (NaCl, KCl, MgCl<sub>2</sub>, CuCl<sub>2</sub>, CoCl<sub>2</sub>, SnCl<sub>2</sub>,  
563 MnCl<sub>2</sub>, ZnCl<sub>2</sub>, NiCl<sub>2</sub>, Pb(NO<sub>3</sub>)<sub>2</sub>, NaBr, NaI, NaNO<sub>3</sub>, NaClO<sub>4</sub>, NaHSO<sub>4</sub>, and NaSCN) were prepared  
564 in water, and DMSO was subsequently added to obtain a final solvent composition of 15% (v/v)  
565 water/DMSO. For anti-interference measurements of POSS-Im-An·Br toward NACs and PAH  
566 derivatives, 2.0 mL of a POSS-Im-An·Br solution ( $1 \times 10^{-6}$  M) in 15% (v/v) water/DMSO was  
567 transferred into a cuvette. Subsequently, 50 equiv. of each analyte ( $1 \times 10^{-4}$  M) were added to  
568 the POSS-Im-An·Br solution using a microsyringe, and the corresponding fluorescence spectra  
569 were recorded as control measurements. Thereafter, 50 equiv. of each inorganic salt solution  
570 were added to the POSS-Im-An·Br solution containing the respective analyte, and the  
571 fluorescence responses were recorded to evaluate the anti-interference performance.

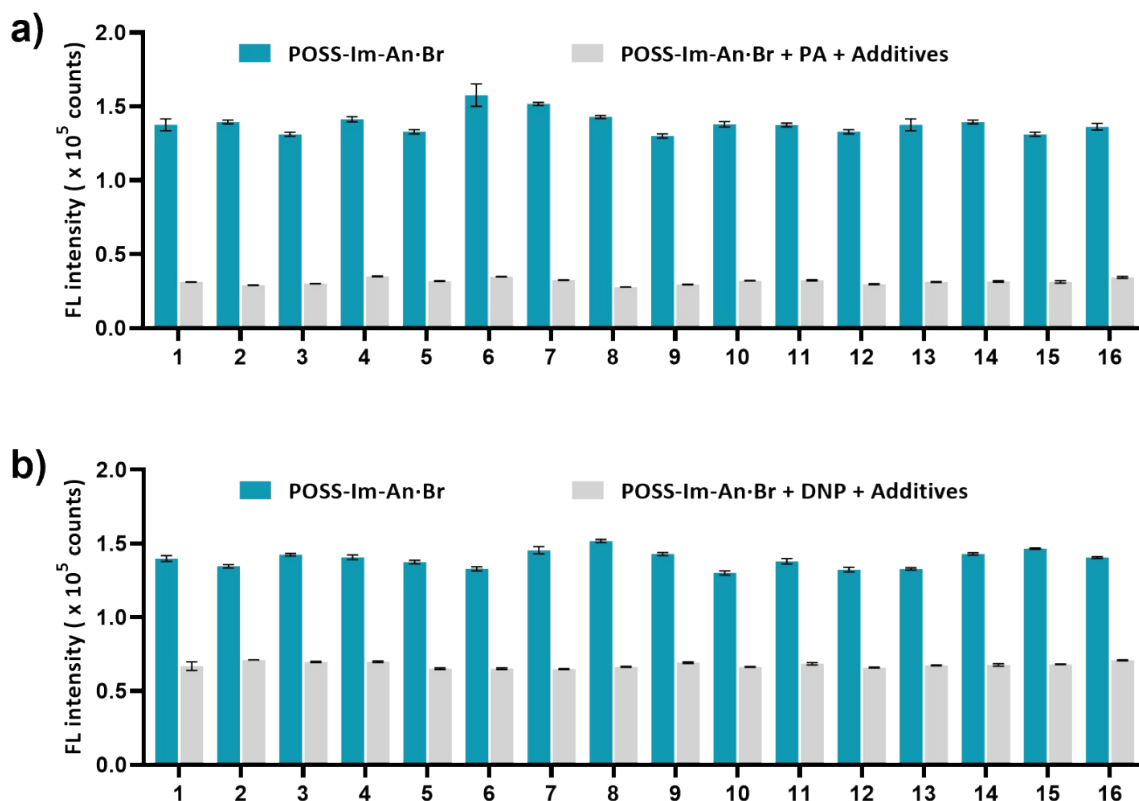

573  
574 **Fig. S36** Fluorescence emission signals of POSS-Im-An·Br in the absence (blue bars) and  
575 presence (grey bars) of the PA (a) and DNP (b) in the presence of additives (50 equiv.) : (1)  
576 blank, (2) Na<sup>+</sup>, (3) K<sup>+</sup>, (4) Mg<sup>2+</sup>, (5) Mn<sup>2+</sup>, (6) Co<sup>2+</sup>, (7) Ni<sup>2+</sup>, (8) Cu<sup>2+</sup>, (9) Zn<sup>2+</sup>, (10) Pb<sup>2+</sup>, (11)  
577 Br<sup>-</sup>, (12) I<sup>-</sup>, (13) NO<sub>3</sub><sup>-</sup>, (14) ClO<sub>4</sub><sup>-</sup>, (15) HSO<sub>4</sub><sup>-</sup>, and (16) SCN<sup>-</sup>.

578

## Supporting Information

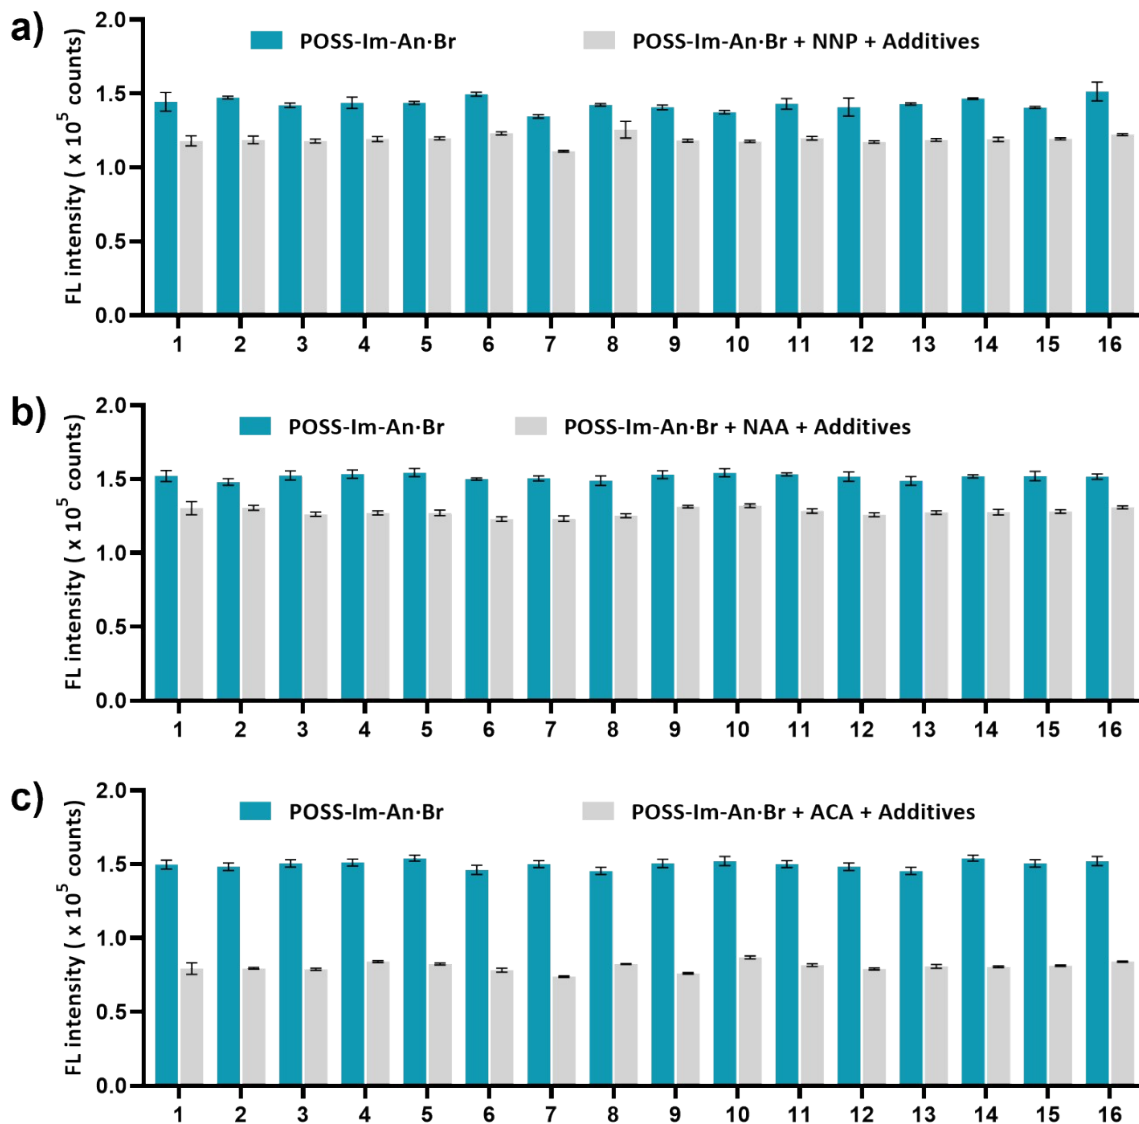

579

580 **Fig. S37** Fluorescence intensities of POSS-Im-An-Br in the absence (blue bars) and presence  
 581 (grey bars) of the NNP (a), NAA (b), and ACA (c) in the presence of additives (50 equiv.): (1)  
 582 blank, (2) Na<sup>+</sup>, (3) K<sup>+</sup>, (4) Mg<sup>2+</sup>, (5) Mn<sup>2+</sup>, (6) Co<sup>2+</sup>, (7) Ni<sup>2+</sup>, (8) Cu<sup>2+</sup>, (9) Zn<sup>2+</sup>, (10) Pb<sup>2+</sup>, (11)  
 583 Br<sup>-</sup>, (12) I<sup>-</sup>, (13) NO<sub>3</sub><sup>-</sup>, (14) ClO<sub>4</sub><sup>-</sup>, (15) HSO<sub>4</sub><sup>-</sup>, and (16) SCN<sup>-</sup>.

584

585

586

587

588

## Supporting Information

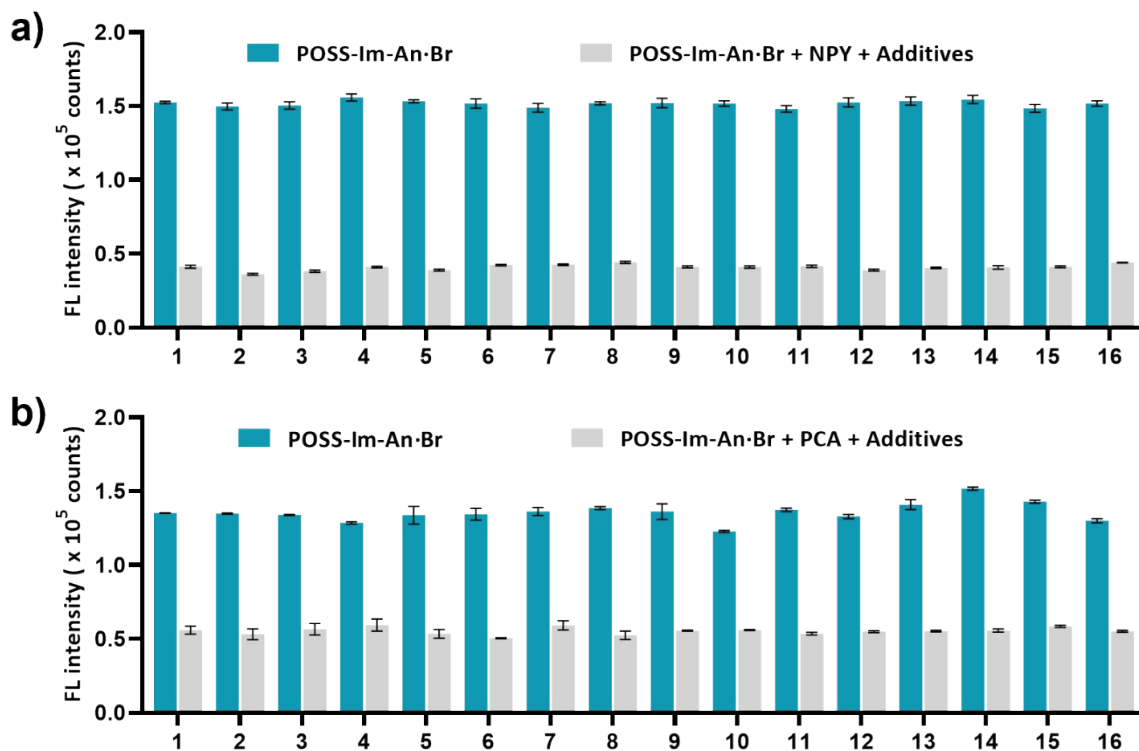

589

590 **Fig. S38** Fluorescence intensities of POSS-Im-An·Br in the absence (blue bars) and presence  
 591 (grey bars) of the NPY (a) and PCA (b) in the presence of additives (50 equiv.): (1) blank, (2)  
 592 Na<sup>+</sup>, (3) K<sup>+</sup>, (4) Mg<sup>2+</sup>, (5) Mn<sup>2+</sup>, (6) Co<sup>2+</sup>, (7) Ni<sup>2+</sup>, (8) Cu<sup>2+</sup>, (9) Zn<sup>2+</sup>, (10) Pb<sup>2+</sup>, (11) Br<sup>-</sup>, (12) I<sup>-</sup>,  
 593 (13) NO<sub>3</sub><sup>-</sup>, (14) ClO<sub>4</sub><sup>-</sup>, (15) HSO<sub>4</sub><sup>-</sup>, and (16) SCN<sup>-</sup>.

594

595

596

597

598

599

600

601

602

603

604



## Supporting Information

For real water sample analysis, tap water (Faculty of Science, Mahidol University, Thailand) and commercial mineral water were used without further pretreatment. Stock solutions of NACs ( $5 \times 10^{-3}$  M) were prepared by dissolving the analytes directly in the corresponding water matrices (tap water or mineral water). For PAH-based compounds with limited water solubility, stock solutions were initially prepared in DMSO. Specifically, one drop of DMSO was added to each PAH compound, followed by gentle heating and magnetic stirring until complete dissolution was achieved. Subsequently, the appropriate water source was added to obtain stock solutions with a concentration of  $5 \times 10^{-3}$  M. These stock solutions were further diluted with the same water source to achieve the desired concentrations ( $1 \times 10^{-4}$  M) for spiking experiments. In the real water sample experiments, 25 equiv. of the spiked real water samples were added to a solution of POSS-Im-An·Br ( $1 \times 10^{-6}$  M) in 15% (v/v) water/DMSO, and the corresponding fluorescence responses were recorded.

617

**Table S3.** Validation of POSS-Im-An·Br for the detection of PA, DNP, NNP, NAA, ACA, NPY, and PCA in real water samples, including recovery results.

| Sensor     | Water sample  | Added( $\mu$ M) | Found ( $\mu$ M) | Recovery (%) |
|------------|---------------|-----------------|------------------|--------------|
| <b>PA</b>  | Tap water     | 25              | 30               | 105          |
|            | Mineral water | 25              | 26               | 120          |
| <b>DNP</b> | Tap water     | 25              | 32               | 128          |
|            | Mineral water | 25              | 31               | 125          |
| <b>NNP</b> | Tap water     | 25              | 31               | 124          |
|            | Mineral water | 25              | 25               | 102          |
| <b>NAA</b> | Tap water     | 25              | 18               | 72           |
|            | Mineral water | 25              | 22               | 18           |
| <b>ACA</b> | Tap water     | 25              | 20               | 79           |
|            | Mineral water | 25              | 22               | 89           |
| <b>NPY</b> | Tap water     | 25              | 33               | 131          |
|            | Mineral water | 25              | 27               | 110          |
| <b>PCA</b> | Tap water     | 25              | *                | *            |
|            | Mineral water | 25              | *                | *            |

\* outlier

## Supporting Information

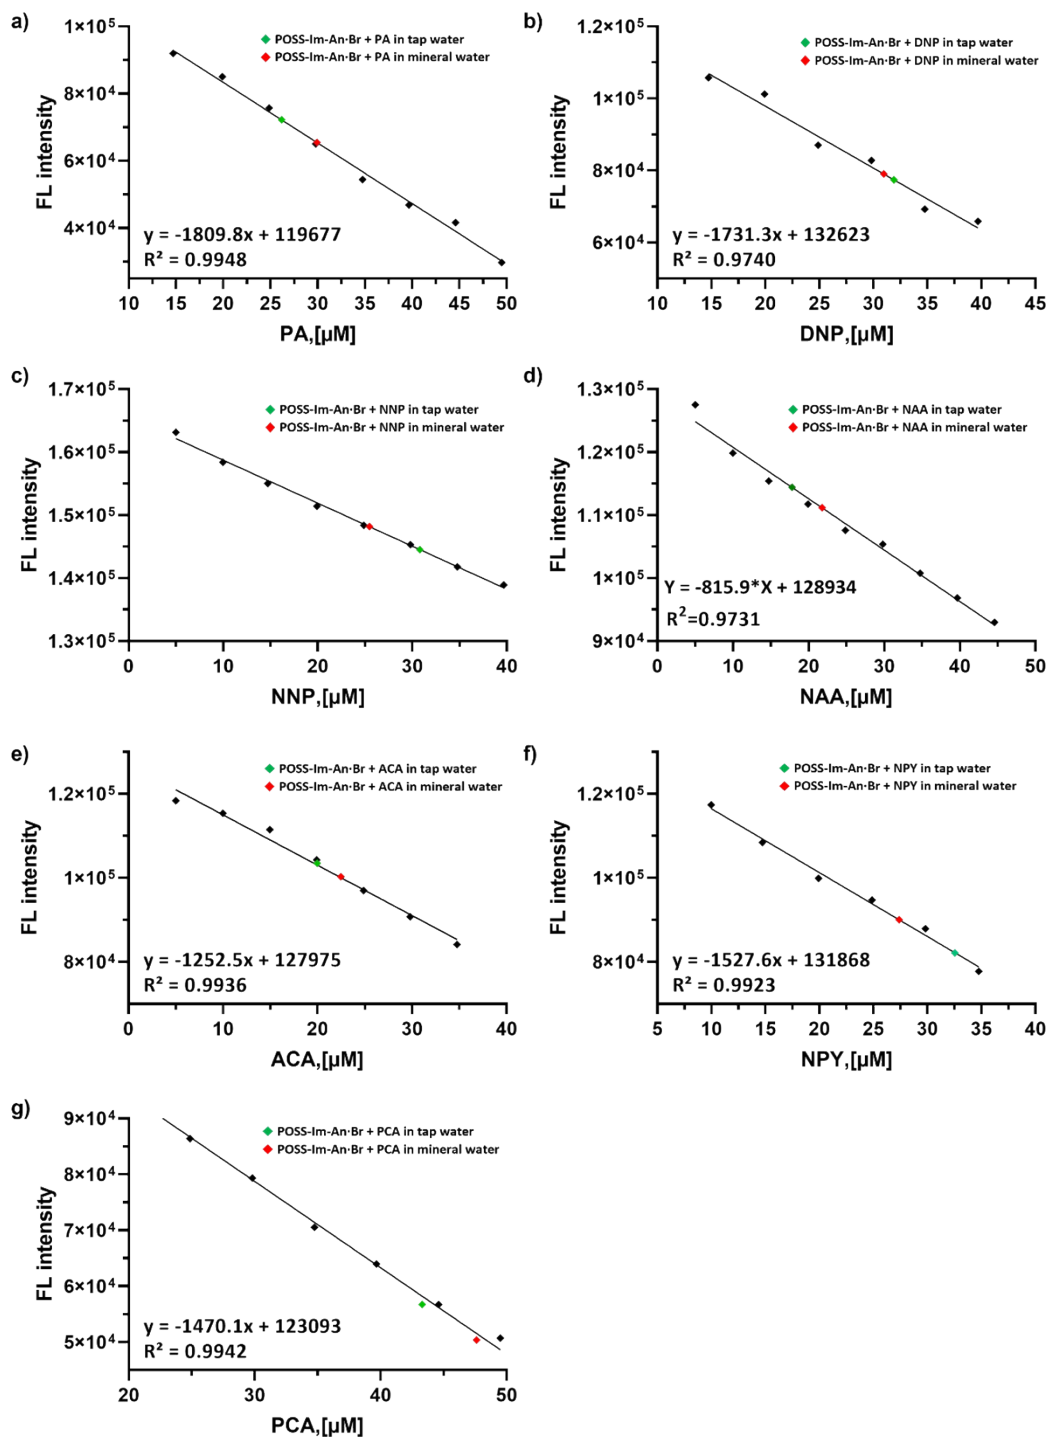

**Fig. S39** Calibration plot obtained by the addition of different concentrations of PA (a), DNP (b), NNP (c), NAA (d), ACA (e), NPY (f), and PCA (g) to POSS-Im-An·Br in 15 % (v/v) water/DMSO for the estimation of analyte in different water resources.

## Supporting Information

### <sup>1</sup>H-NMR Titration

The <sup>1</sup>H-NMR titration study confirmed the interaction between the POSS-Im-An·Br and selective analytes for the sensing mechanism. The  $5 \times 10^{-3}$  M of POSS-Im-An·Br solution was prepared in CDCl<sub>3</sub> and d<sub>6</sub>-DMSO, and  $2.5 \times 10^{-1}$  M of NPY, PCA, NAA, ACA, and NNP in CDCl<sub>3</sub> and d<sub>6</sub>-DMSO, while PA and DNP in only d<sub>6</sub>-DMSO. Various types of analyte solutions were added to the NMR tube by micro syringe from 0–5 equiv. and NMR spectra were collected after the final addition of each analyte.

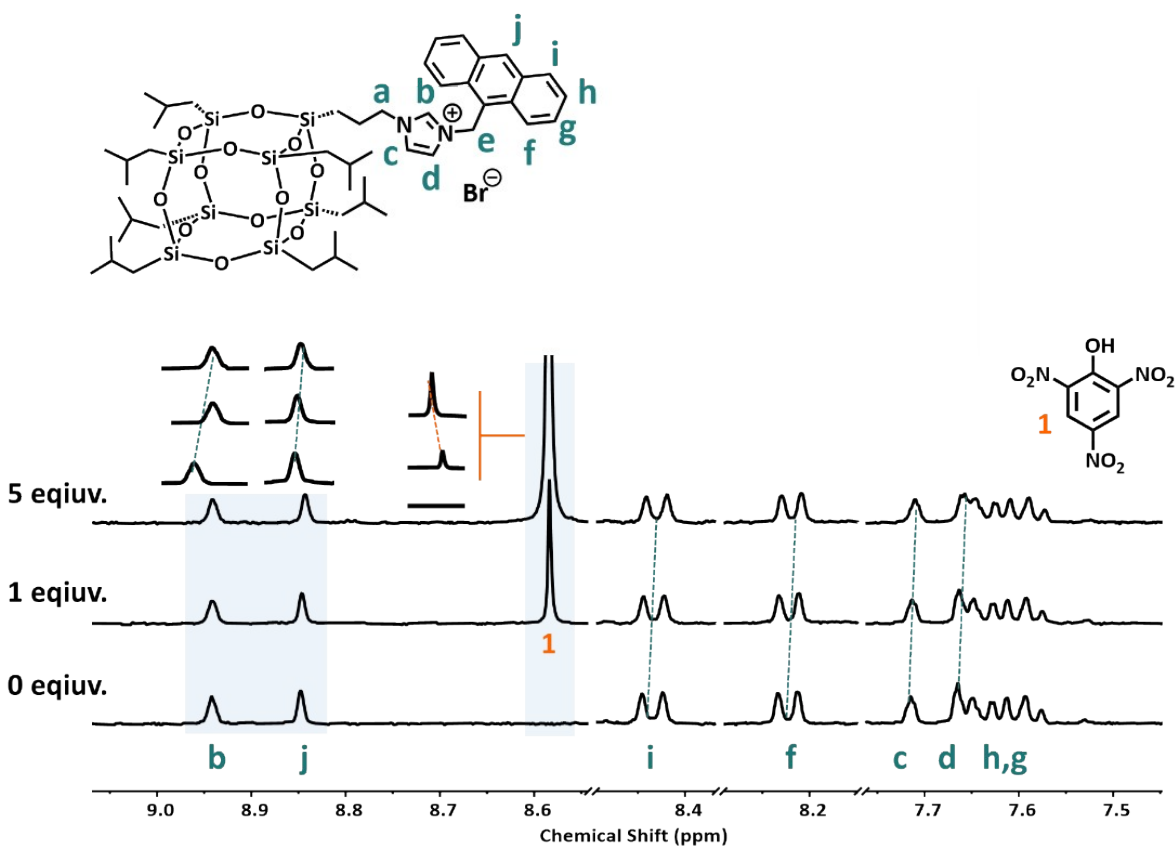

**Fig. S40** Partial <sup>1</sup>H-NMR titration of POSS-Im-An·Br ( $5 \times 10^{-3}$  M) and 0–5 equiv. of PA in d<sub>6</sub>-DMSO.

## Supporting Information

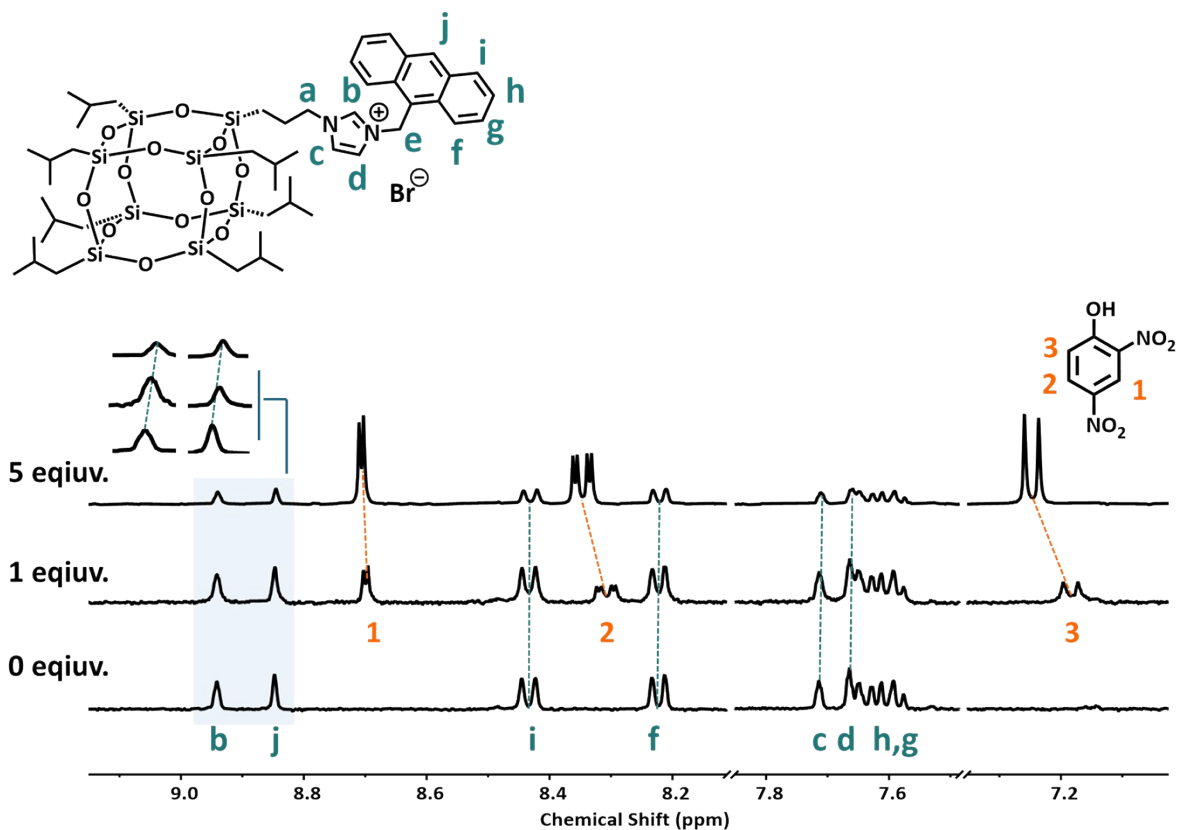

**Fig. S41** Partial <sup>1</sup>H-NMR titration of POSS-Im-An-Br (5 × 10<sup>-3</sup> M) and 0–5 equiv. of DNP in d<sub>6</sub>-DMSO.

## Supporting Information

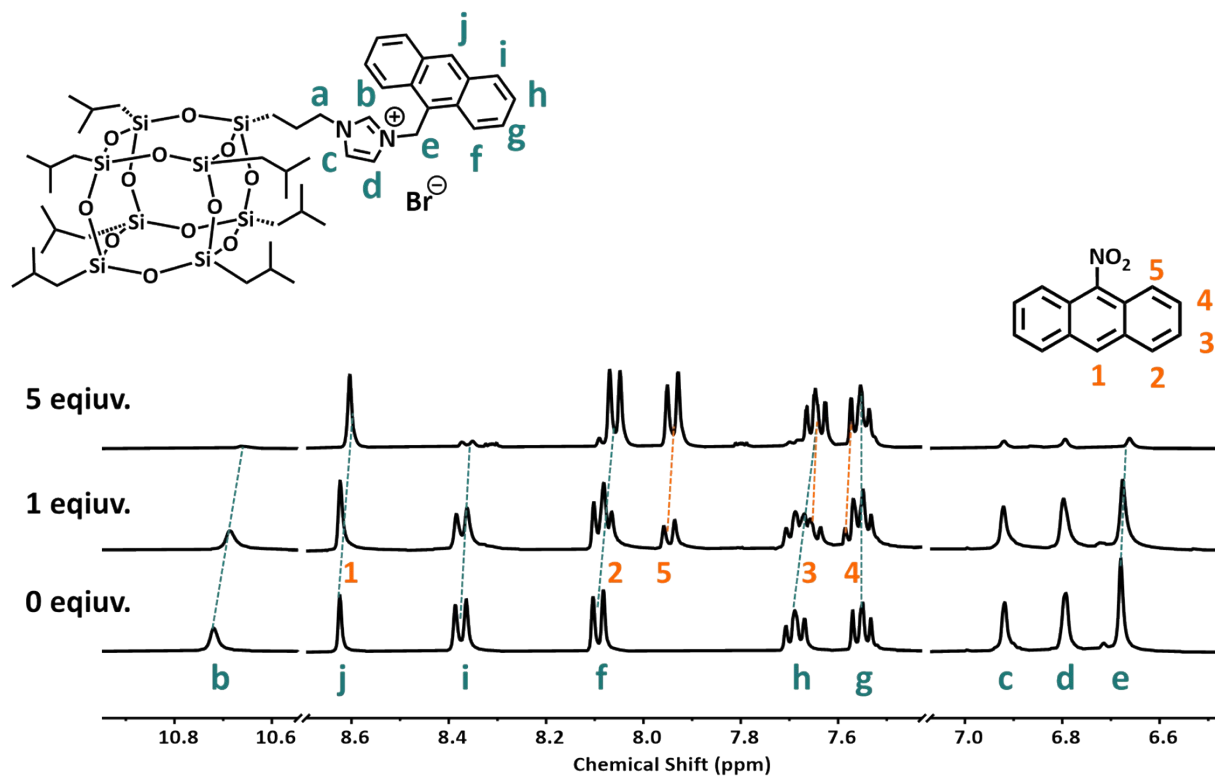

670

671 **Fig. S42** Partial <sup>1</sup>H-NMR titration of POSS-Im-An-Br (5 × 10<sup>-3</sup> M) and 0–5 equiv. of NAA in  
 672 CDCl<sub>3</sub>.

673

674

675

676

677

678

679

680

681

## Supporting Information

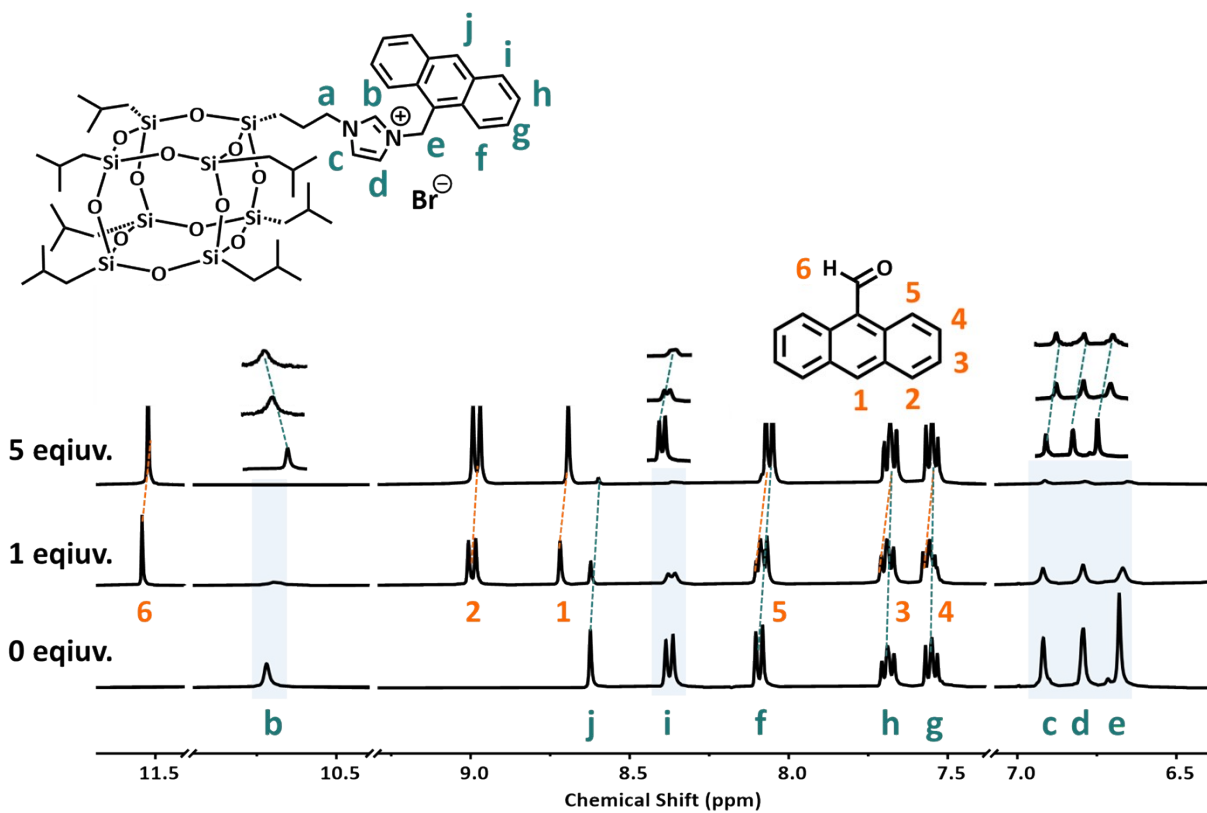

682

683 **Fig. S43** Partial <sup>1</sup>H-NMR titration of POSS-Im-An·Br (5 × 10<sup>-3</sup> M) and 0–5 equiv. of ACA in  
 684 CDCl<sub>3</sub>.

685

686

687

688

689

690

691

692

693

694

## Supporting Information

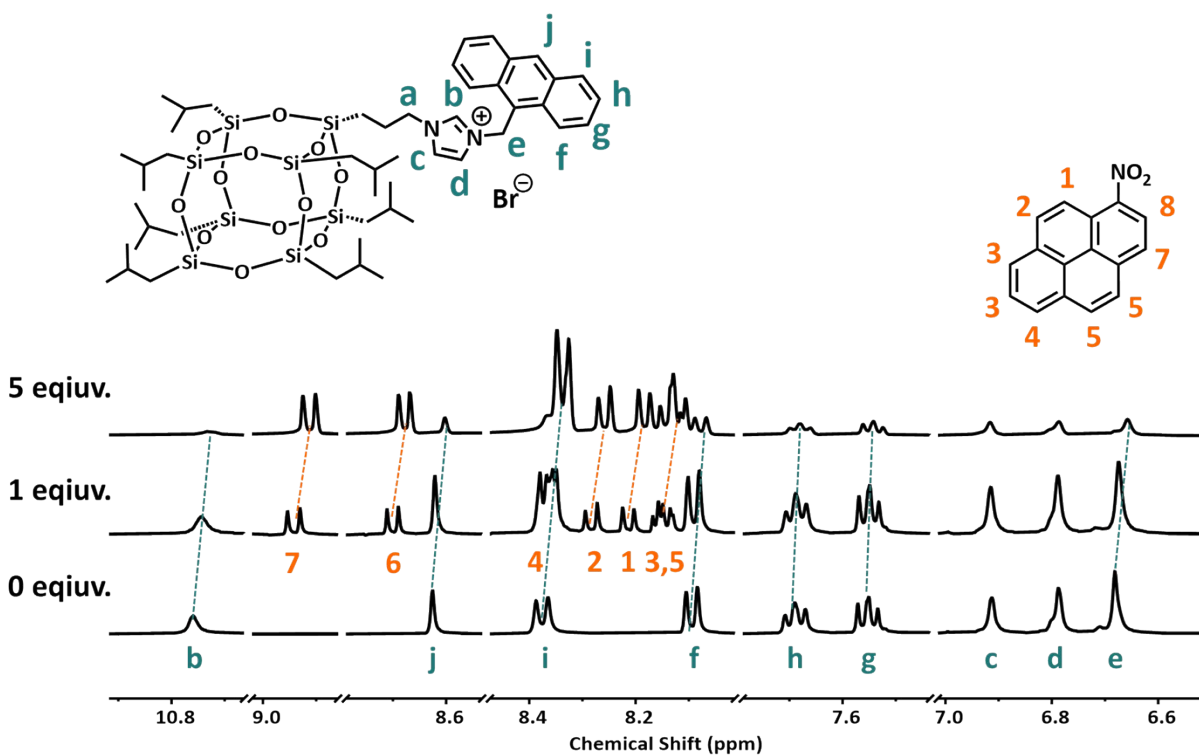

**Fig. S44** Partial <sup>1</sup>H-NMR titration of POSS-Im-An·Br (5 × 10<sup>-3</sup> M) and 0–5 equiv. of NPY in CDCl<sub>3</sub>.

## Supporting Information

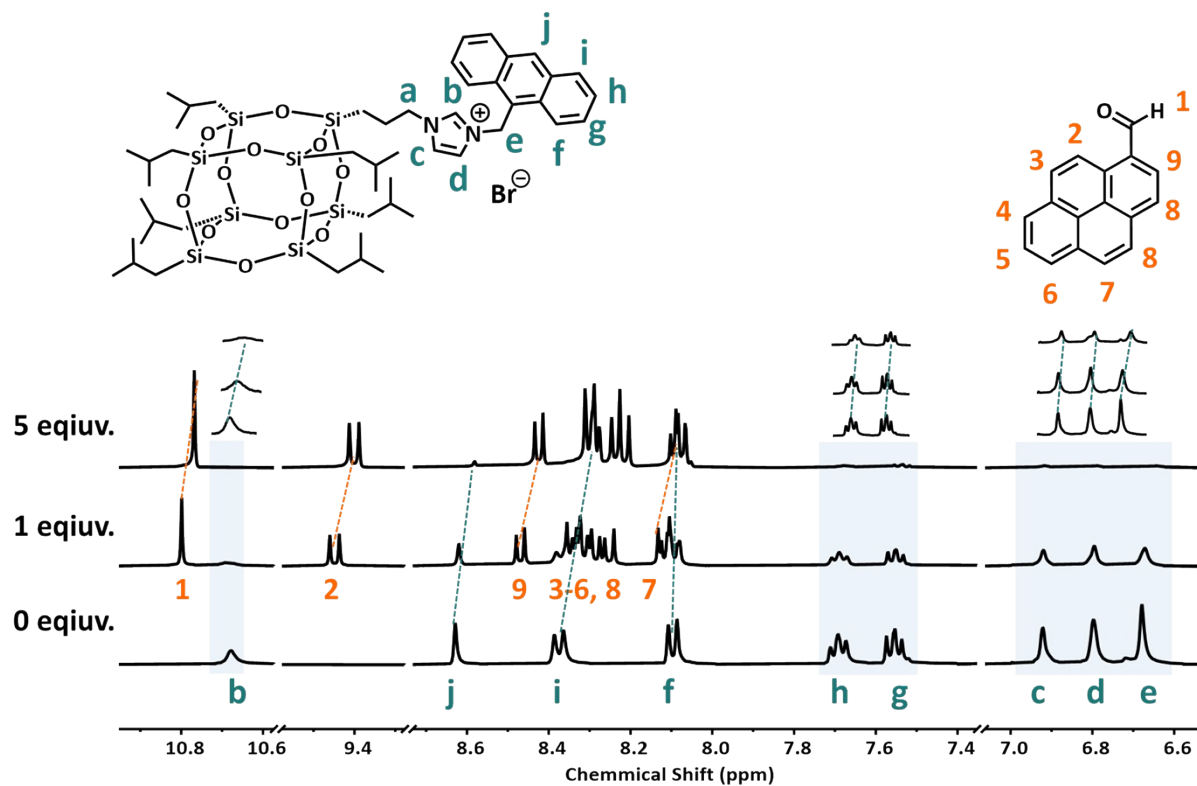

**Fig. S45** Partial <sup>1</sup>H-NMR titration of POSS-Im-An·Br (5 × 10<sup>-3</sup> M) and 0–5 equiv. of PCA in CDCl<sub>3</sub>.



## Supporting Information

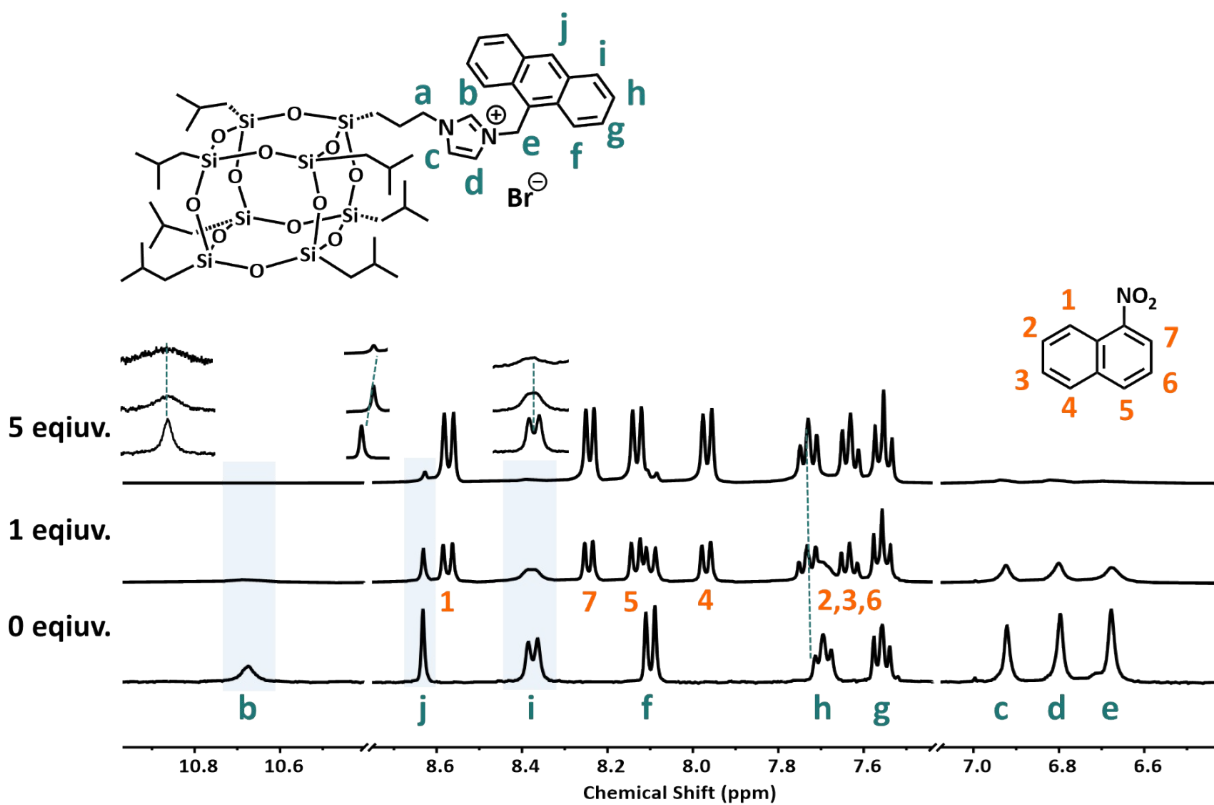

**Fig. S46** Partial  $^1\text{H}$ -NMR titration of POSS-Im-An·Br ( $5 \times 10^{-3}$  M) and 0–5 equiv. of NNP in  $\text{CDCl}_3$ .

## DFT Computational Details

## Supporting Information

733 All the calculations were done using aug-cc-pVDZ/ $\omega$ 97X-D3 in DMSO with DMSO as a  
 734 solvent from SMD model. As aug-cc-pVDZ does not cover the iodine atom, in PIP, ma-def2-  
 735 SVP was assigned to only the iodine atom, while the other atoms still bear aug-cc-pVDZ. def2/J,  
 736 aug-cc-pVTZ/JK, and aug-cc-pVTZ/C auxiliary basis sets were used, except for PIP which  
 737 def2/J, def2/JK, def2-TZVP/C, were assigned. The optimized geometry was verified through  
 738 vibrational frequencies. All calculations were performed by ISCE2, A\*STAR cluster with AMD  
 739 Genoa 9654 DP @ 2.4GHz using 48 cores.

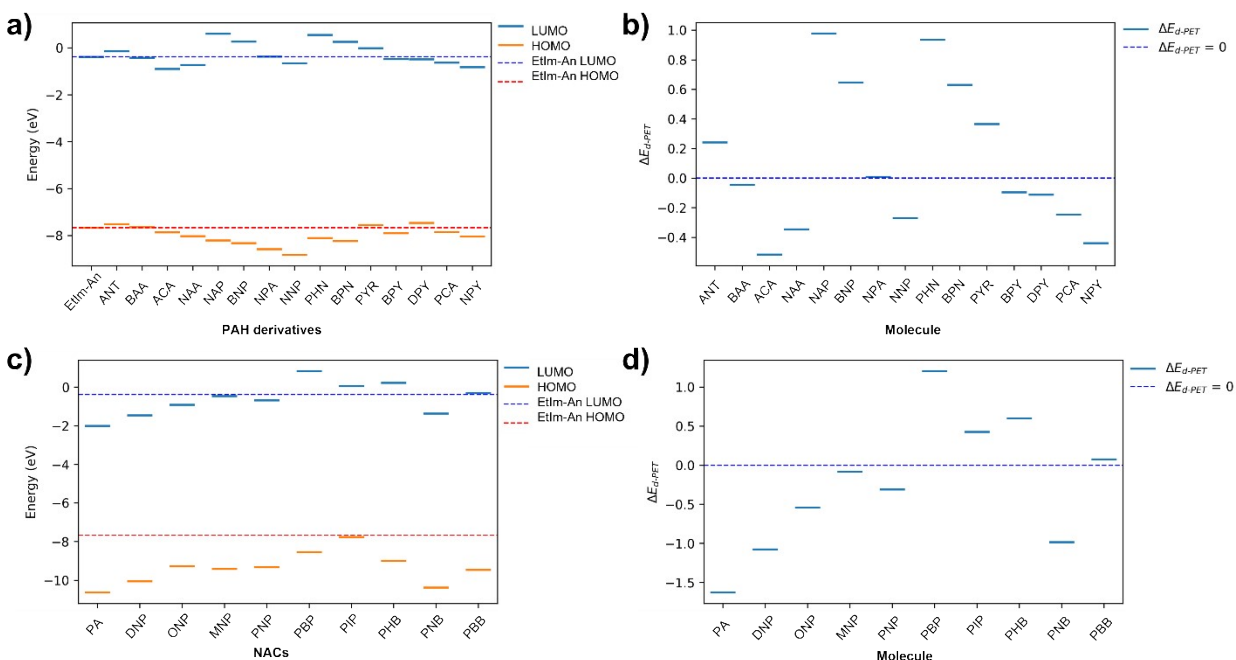

740 **Fig. S47** a) MO energy diagram of PAH derivatives where the HOMO and LUMO of EtIm-An  
 741 were plotted in dash lines. b)  $\Delta E_{d-PET}$  of PAH derivatives in comparison to EtIm-An. c) MO  
 742 energy diagram of NACs where the HOMO and LUMO of EtIm-An were plotted in dash lines.  
 743 d)  $\Delta E_{d-PET}$  of NACs in comparison to EtIm-An.

## Supporting Information

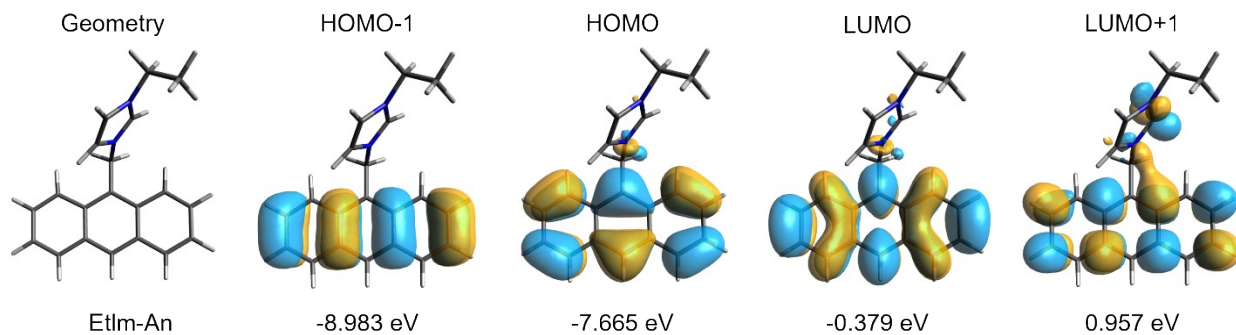

**Fig. S48** FMOs and optimized geometry of active size of POSS-Im-An·Br (EtIm-An), HOMO and LUMO energy values were shown in eV.

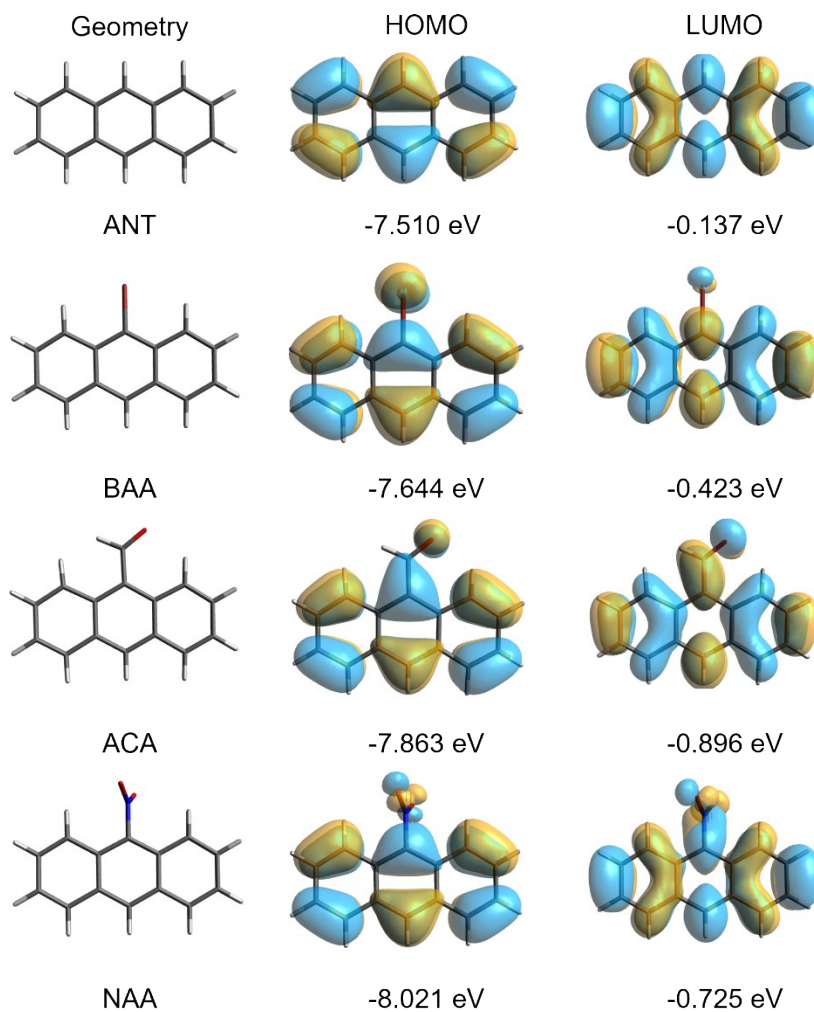

**Fig. S49** FMOs and optimized geometry of PAHs (anthracene derivatives), HOMO and LUMO energy values were shown in eV.

## Supporting Information

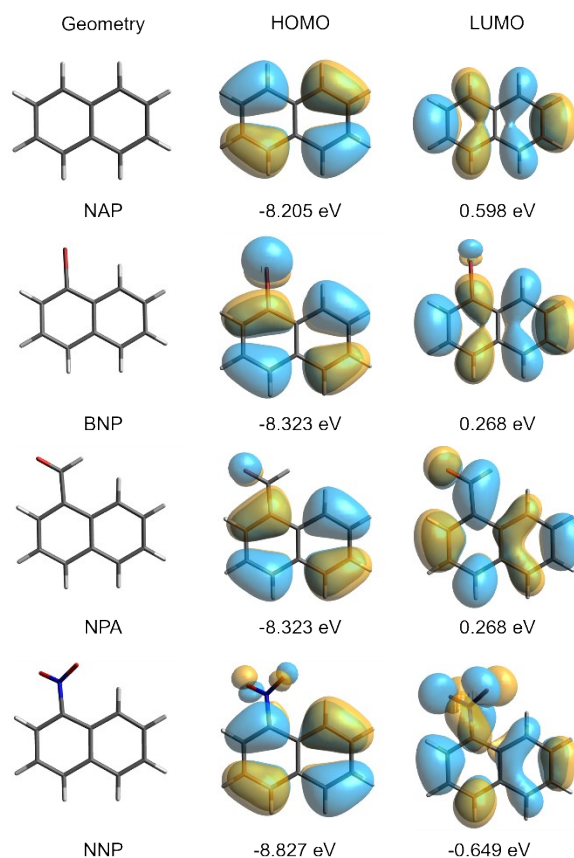

755

756 **Fig. S50** FMOs and optimized geometry of PAHs (naphthalene derivatives), HOMO and  
757 LUMO energy values were shown in eV.

758

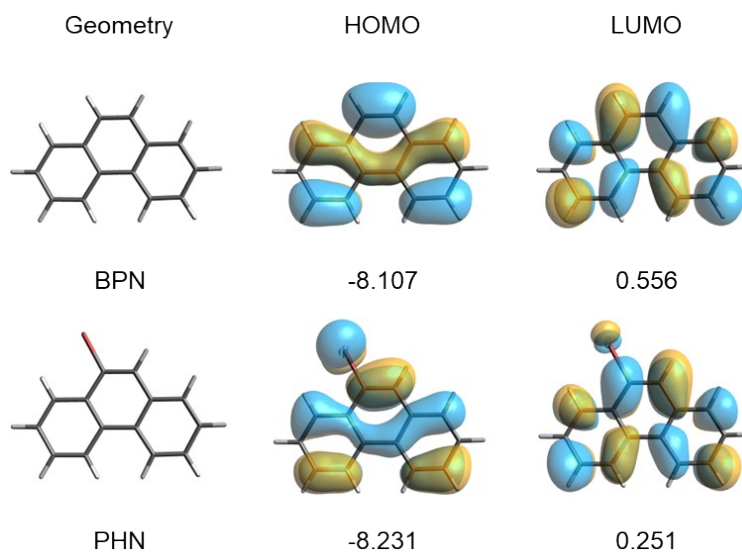

759

760 **Fig. S51** FMOs and optimized geometry of PAHs (phenanthroline derivatives), HOMO and  
761 LUMO energy values were shown in eV.

## Supporting Information

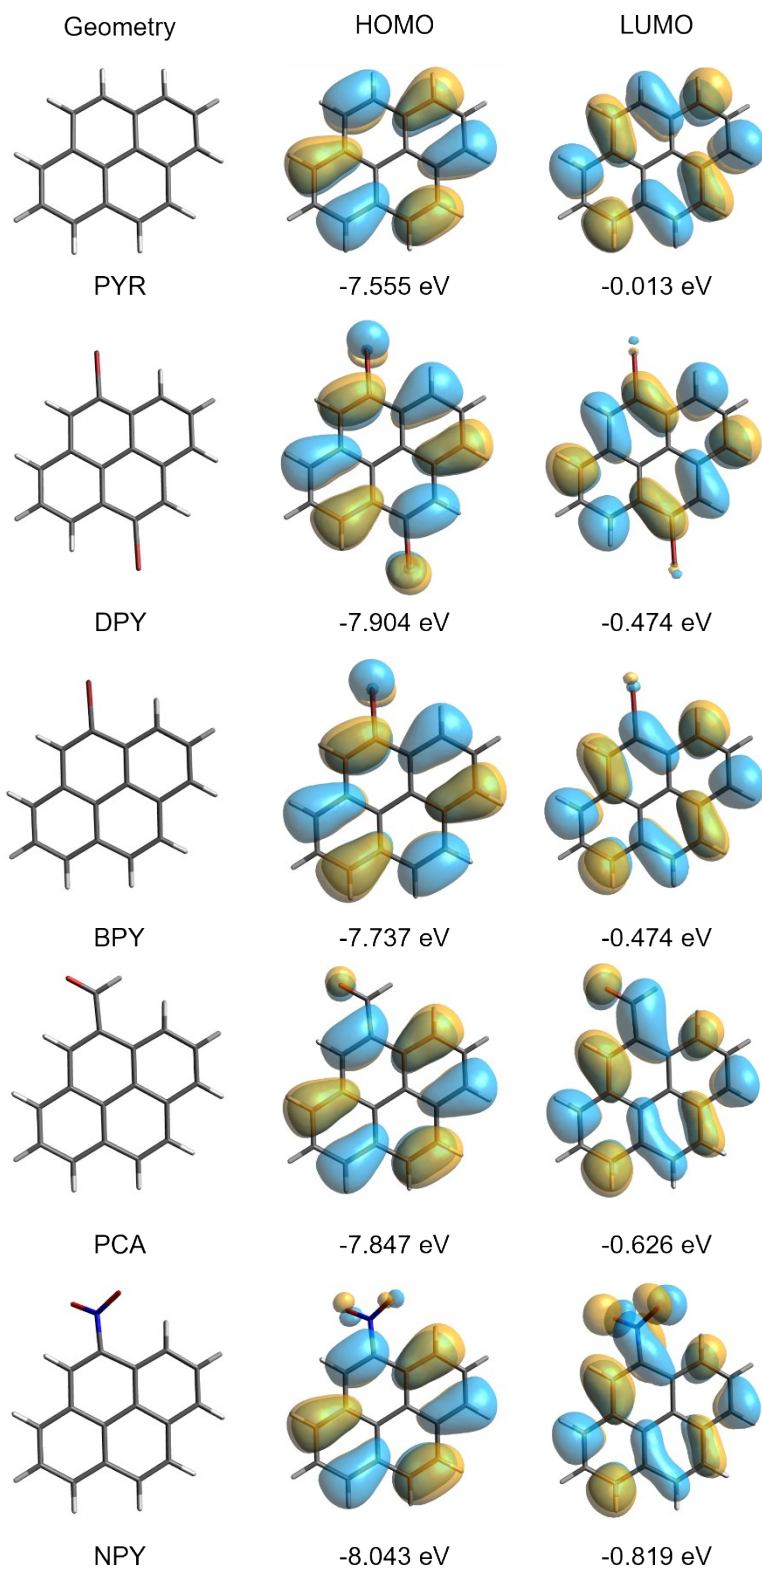

762

763 **Fig. S52** FMOs and optimized geometry of PAHs (pyrene derivatives), HOMO and LUMO  
764 energy values were shown in eV.

## Supporting Information

765

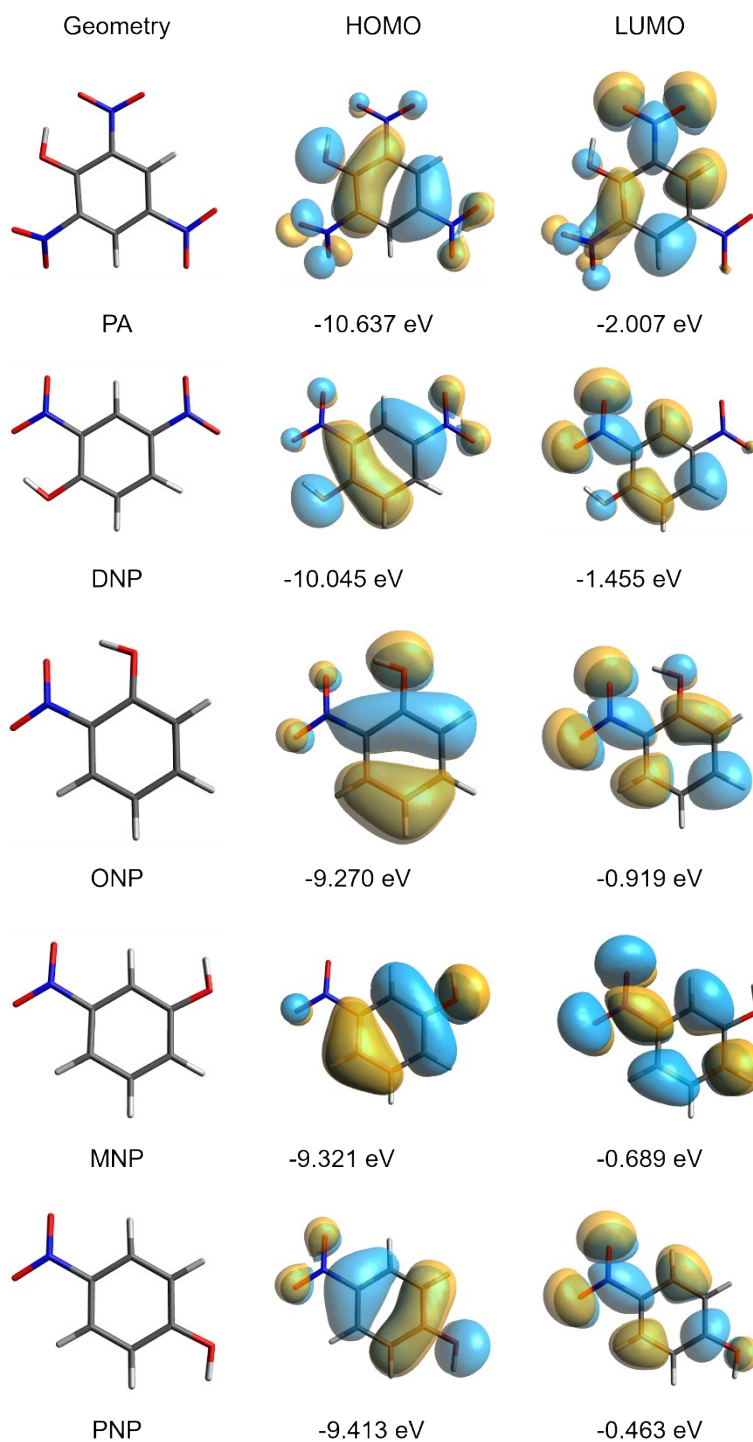

766

767 **Fig. S53** FMOs and optimized geometry of NACs (PA, DNP, ONP, MNP, and PNP), HOMO  
768 and LUMO energy values were shown in eV.

769



## Supporting Information

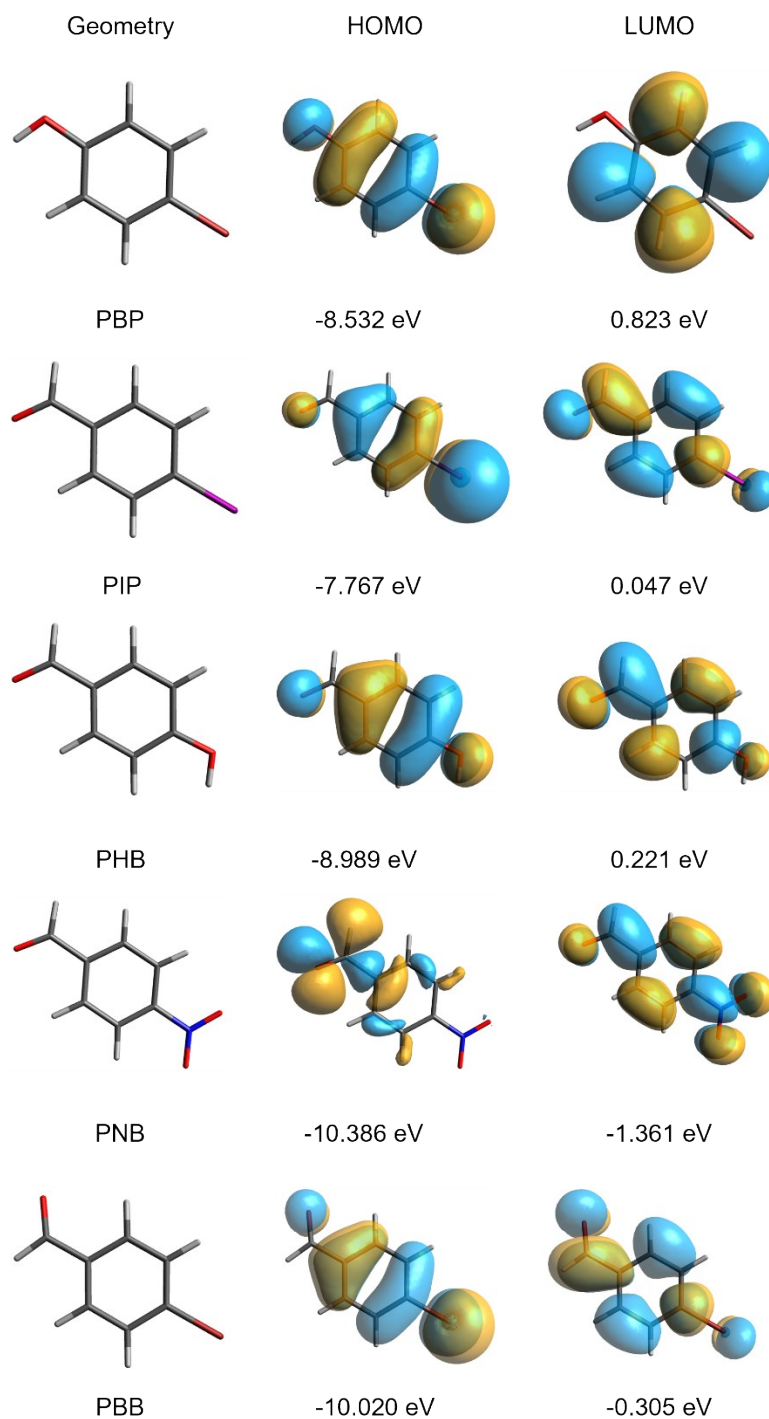

**Fig. S54** FMOs and optimized geometry of NACs (PBP, PIP, PHB, PNB, and PBB), HOMO and LUMO energy values were shown in eV.

## Supporting Information

### 775 Reference

- 776 1. N. Prigyai, S. Chanmungkalakul, V. Ervithayasuporn, N. Yodsin, S. Jungsuttiwong, N. Takeda, M.  
777 Unno, J. Boonmak and S. Kiatkamjornwong, *Inorg. Chem.*, 2019, **58**, 15110-15117.
- 778 2. V. Ervithayasuporn, X. Wang and Y. Kawakami, *Chem. Commun.*, 2009, 5130-5132.
- 779 3. M. G. Fabbrini, D. Cirri, A. Pratesi, L. Ciofi, T. Marzo, A. Guerri, S. Nistri, A. Dell'Accio, T. Gamberi,  
780 M. Severi, A. Bencini and L. Messori, *ChemMedChem*, 2019, **14**, 182-188.
- 781 4. R. Bondi, L. Dalla Via, M. Hyeraci, G. Pagot, L. Labella, F. Marchetti and S. Samaritani, *J. Inorg.*  
782 *Biochem.*, 2021, **216**, 111335.
- 783 5. P. Thordarson, *Chem. Soc. Rev.*, 2011, **40**, 1305-1323.
- 784 6. N. Venkatramaiah, S. Kumar and S. Patil, *Chem. Commun.*, 2012, **48**, 5007-5009.
- 785 7. M. Mahato, S. Mardanya, Z. Rahman, N. Tohora, P. Pramanik, S. Ghanta, A. A. Chowdhury, T. K.  
786 Shaw and S. K. Das, *J. Photochem. Photobiol., A*, 2022, **433**, 114168.
- 787 8. J. Pan, F. Tang, A. Ding, L. Kong, L. Yang, X. Tao, Y. Tian and J. Yang, *RSC Adv.*, 2015, **5**, 191-195.
- 788 9. A. Pramanik, S. Majumder, H. A. Sparkes and S. Mohanta, *Dalton Trans.*, 2022, **51**, 14700-14711.
- 789 10. L. R. Adil, P. Gopikrishna and P. Krishnan Iyer, *ACS Appl. Mater. Interfaces*, 2018, **10**, 27260-  
790 27268.
- 791 11. S. Senthilkumar, R. Goswami, N. L. Obasi and S. Neogi, *ACS Sustainable Chem. Eng.*, 2017, **5**,  
792 11307-11315.
- 793 12. J. Liu, Y. Zhong, P. Lu, Y. Hong, J. W. Y. Lam, M. Faisal, Y. Yu, K. S. Wong and B. Z. Tang, *Polym.*  
794 *Chem.*, 2010, **1**, 426-429.
- 795 13. P. Kumar, D. Arya, D. Nain, A. Singh, A. Ghosh and D. A. Jose, *Dyes Pigm.*, 2019, **166**, 443-450.
- 796 14. I. R. Comnea-Stancu, J. F. van Staden, R.-I. Stefan-van Staden and R. N. State, *Chemosphere*,  
797 2023, **310**, 136909.
- 798 15. J. Tropp, M. H. Ihde, A. K. Williams, N. J. White, N. Eedugurala, N. C. Bell, J. D. Azoulay and M.  
799 Bonizzoni, *Chem. Sci.*, 2019, **10**, 10247-10255.
- 800 16. M. C. Stoian, O. G. Simionescu, C. Romanitan, G. Craciun, C. Pachiu and A. Radoi, *Sensors*, 2024,  
801 **24**, 7194.

802
